# Supplementary material for: N-Heterocyclic carbene-based ruthenium-hydride catalysts for the synthesis of unsymmetrically functionalized double-decker silsesquioxanes
Source: Royal Society of Chemistry journal article supplement (doi:10.1039/c8cc01316k), 2018-01-01

## Supporting Information

for

### N-Heterocyclic carbene-based ruthenium–hydride catalysts for the synthesis of unsymmetrically functionalized double-decker silsesquioxanes

Patrycja Żak,<sup>a,\*</sup> Lionel Delaude,<sup>b</sup> Beata Dudziec<sup>a</sup> and Bogdan Marciniec<sup>a,c,\*</sup>

<sup>a</sup> Department of Organometallic Chemistry, Faculty of Chemistry, Adam Mickiewicz University in Poznań, Umultowska 89b, 61-614 Poznań, Poland

<sup>b</sup> Laboratory of Organometallic Chemistry and Homogeneous Catalysis, Institut de Chimie (B6a), Allée du six Août 13, Quartier Agora, Université de Liège, 4000 Liège, Belgium

<sup>c</sup> Centre for Advanced Technologies, Adam Mickiewicz University in Poznań, Umultowska 89c, 61-614 Poznań, Poland

#### CONTENTS:

|      |                                                                                                                             |      |
|------|-----------------------------------------------------------------------------------------------------------------------------|------|
| 1.   | Materials and methods                                                                                                       | S-2  |
| 2.   | Synthesis and characterization of ruthenium–hydride complexes I–IV                                                          | S-3  |
| 2.1. | Method A: from $[RuHCl(CO)(PCy_3)_2]$                                                                                       | S-3  |
| 2.2. | Method B: from $[RuCl_2(=CHPh)(NHC)(PCy_3)]$                                                                                | S-3  |
| 3.   | General procedures for catalytic tests                                                                                      | S-4  |
| 3.1. | Silylative coupling of $ViSi(OSiMe_3)_3$ with styrene                                                                       | S-4  |
| 3.2. | Silylative coupling of DDSQ-2 $ViSiMe$ ( <b>1A</b> ) with 4-chlorostyrene ( <b>2d</b> )                                     | S-5  |
| 3.3. | Silylative coupling of DDSQ-2 $ViSi$ ( <b>1A-C</b> ) with styrenes                                                          | S-5  |
| 4.   | General procedure for the synthesis of symmetrically functionalized divinylsil-sesquioxanes <b>4A-a-a</b> and <b>4A-e-e</b> | S-5  |
| 5.   | General procedure for the synthesis of unsymmetrically functionalized divinylsil-sesquioxanes                               | S-5  |
| 6.   | Analytical data of isolated products                                                                                        | S-6  |
| 7.   | References                                                                                                                  | S-12 |
| 8.   | NMR spectra of isolated products                                                                                            | S-13 |
| 8.1. | Symmetrically functionalized divinylsil-sesquioxanes                                                                        | S-13 |
| 8.2. | Unymmetrically functionalized divinylsil-sesquioxanes                                                                       | S-16 |

## 1. Materials and methods

All the syntheses and catalytic tests were carried out under a dry argon atmosphere using standard Schlenk-line and vacuum techniques.  $^1\text{H}$  and  $^{13}\text{C}$  NMR spectra were recorded on a Bruker Ultrashield 300 spectrometer operating at 300 and 100.63 MHz, respectively.  $^{31}\text{P}$  NMR spectra were recorded on a Mercury 300 spectrometer operating at 121.5 MHz.  $^{29}\text{Si}$  NMR spectra were recorded on a Bruker Ascend 400 Nanobay spectrometer operating at 79.50 MHz. High-resolution mass spectroscopy was performed using a Waters Synapt G2-S HDMS mass spectrometer equipped with an electrospray ion source and a quadrupole-time-of-flight mass analyzer with the resolving power FWHM 38000 using methanol as the solvent. The capillary voltage was set to 4.5 kV, the sampling was set at 40 and the source temperature was 120 °C. In the ESI-MS spectra, the sodiated ion was observed as the most abundant ion. Additionally, protonated ions and cluster ions with methanol were present in all the spectra with various intensities. GC analyses were carried out on a Varian CP-3800 instrument equipped with a Rtx-5 column (30 m length, 0.53 mm internal diameter) and a thermal conductivity detector (TCD). GC/MS analyses were performed on a Varian Saturn 2100T instrument equipped with a DB-5 capillary column (30 m length) and an ion trap detector. Fourier-transform infrared spectra were recorded on a Bruker Tensor 27 spectrophotometer equipped with a SPECAC Golden Gate, diamond ATR unit. In all cases, 16 scans at a resolution of  $2\text{ cm}^{-1}$  were recorded. Thin layer chromatography was performed on plates coated with 250  $\mu\text{m}$  thick silica gel. Column chromatography was performed on silica gel 60 (70–230 mesh) using *n*-hexane/dichloromethane as eluent.

Dichloromethane, acetone, tetrahydrofuran, ethanol, methanol, propanol, chloroform-*d*, benzene-*d*<sub>6</sub>, styrene, 4-chlorostyrene, 4-bromostyrene, 4-methoxystyrene, 4-(trifluoromethyl)styrene, 4-methylstyrene, potassium bis(trimethylsilyl)amide (KHMDs), tricyclohexylphosphine, calcium hydride, 1,5-cyclooctadiene, decane, dodecane, ethyl vinyl ether, vinyloxytrimethylsilane, 2,6-diisopropylaniline, paraformaldehyde, 2,4,6-trimethylaniline, glyoxal (40 wt. % solution in water), ethyl acetate, zinc chloride, sodium chloride, hydrochloric acid, sodium tetrafluoroborate, formic acid, triethyl orthoformate, chlorotrimethylsilane, anhydrous magnesium sulfate, copper(I) chloride and 4 Å molecular sieves were purchased from Aldrich. Triethylamine and silica gel 60 were obtained from Fluka. Vinylmethylchlorosilane was purchased from ABCR. Tetrasilanol POSS (DDSQ-4OH) was obtained from Hybrid Plastics. *n*-Hexane and toluene were purchased from Chempur. The Grubbs first generation benzylidene catalyst was supplied by Apeiron Synthesis. Ruthenium(III) chloride hydrate came from Lancaster. 1,3-bis(2,4,6-trimethylphenyl)imidazolium chloride (IMes•HCl), 1,3-bis(2,6-diisopropylphenyl)imidazolium chloride (IDip•HCl), 1,3-bis(2,4,6-trimethylphenyl)imidazolium chloride (SIMes•HCl), and 1,3-bis(2,6-diisopropylphenyl)imidazolium chloride (SIDip•HCl) were prepared according to published procedures.<sup>1–3</sup> The  $[\text{RuHCl}(\text{CO})(\text{PCy}_3)_2]$  complex<sup>4</sup> and divinyl-substituted double-decker silsesquioxanes (DDSQ-2Vi) **1A–C**<sup>5</sup> were synthesized according to literature. All the

solvents (except tetrahydrofuran) were dried over  $\text{CaH}_2$  prior to use and stored under argon over  $4\text{\AA}$  molecular sieves. Dichloromethane (DCM) was additionally passed through a column filled with alumina and after that it was degassed by repeated freeze-pump-thaw cycles. Tetrahydrofuran (THF) was dried over sodium benzophenone ketyl and freshly distilled prior to use.

## 2. Synthesis and characterization of ruthenium–hydride complexes I-IV

### 2.1. Method A: from $[\text{RuHCl}(\text{CO})(\text{PCy}_3)_2]$

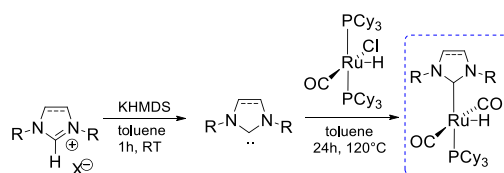

A 25 mL high-pressure Schlenk vessel equipped with a magnetic stirring bar and connected to gas and vacuum lines was charged with an imidazol(in)ium salt ( $5.84 \times 10^{-4}$  mol, 1 equiv.), potassium bis(trimethylsilyl)amide (128 mg,  $6.43 \times 10^{-4}$  mol, 1.1 equiv.) and dry toluene (5 mL). The reaction mixture was stirred at room temperature for 1 h. The  $[\text{RuHCl}(\text{CO})(\text{PCy}_3)_2]$  complex (424 mg,  $5.84 \times 10^{-4}$  mol, 1 equiv.) was then added and the reaction mixture was stirred for 24 h at 120 °C. After this time, the reaction mixture was filtered on a pad of Celite and the pad was rinsed with toluene. The solvent was evaporated under vacuum. Cold ethanol was added to the residue to afford a yellow-orange precipitate. The precipitate was filtered off and dried under vacuum.

### 2.2. Method B: from $[\text{RuCl}_2(=\text{CHPh})(\text{NHC})(\text{PCy}_3)]$

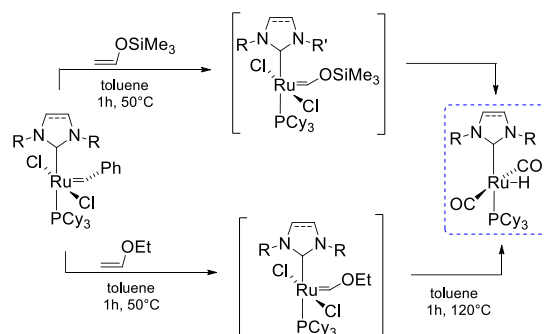

A 25 mL high-pressure Schlenk vessel equipped with a magnetic stirring bar and connected to gas and vacuum lines was charged with  $[\text{RuCl}_2(=\text{CHPh})(\text{NHC})(\text{PCy}_3)]$  ( $1.77 \times 10^{-4}$  mol, 1 equiv.), ethyl vinyl ether or vinyloxytrimethylsilane ( $1.77 \times 10^{-2}$  mol, 100 equiv.) and dry toluene (5 mL). The reaction mixture was stirred at 50 °C for 1 h and at 120 °C for an additional hour when ethyl vinyl ether was used. After this time, the solvent was evaporated under vacuum. Cold ethanol was added to the residue to afford a yellow-orange precipitate. The precipitate was filtered off and dried under vacuum.

|                                                                                                              |                                                                                                                                                                                                                                                                                                                                                                                                                                                                                                                                                                                                                                                                                                                                                                                                                                                                                                                                                                                                                                                                                                                                                                                                                                                                                                                                                                                                                                                                                                                                                                                                                                                                                                                                                                                                                                                                                                                                                                                                                                |
|--------------------------------------------------------------------------------------------------------------|--------------------------------------------------------------------------------------------------------------------------------------------------------------------------------------------------------------------------------------------------------------------------------------------------------------------------------------------------------------------------------------------------------------------------------------------------------------------------------------------------------------------------------------------------------------------------------------------------------------------------------------------------------------------------------------------------------------------------------------------------------------------------------------------------------------------------------------------------------------------------------------------------------------------------------------------------------------------------------------------------------------------------------------------------------------------------------------------------------------------------------------------------------------------------------------------------------------------------------------------------------------------------------------------------------------------------------------------------------------------------------------------------------------------------------------------------------------------------------------------------------------------------------------------------------------------------------------------------------------------------------------------------------------------------------------------------------------------------------------------------------------------------------------------------------------------------------------------------------------------------------------------------------------------------------------------------------------------------------------------------------------------------------|
| 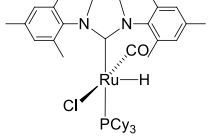 <p><b>Complex I</b></p>    | <p>Yellow-orange solid (85% isolated yield); <math>^1\text{H}</math> NMR (<math>\text{C}_6\text{D}_6</math>, <math>\delta</math>, ppm): <math>-24.90</math> (d, 1H, <math>J_{\text{HH}} = 21.3</math> Hz, Ru-H), <math>2.13</math> (s, 6H, <math>p\text{-CH}_3</math>), <math>1.09 - 1.89</math>, <math>2.20 - 2.22</math> (m, 33H, Cy), <math>2.55 - 2.67</math> (br s, 12H, <math>o\text{-CH}_3</math>), <math>3.25</math> (s, 4H, <math>\text{NCH}_2</math>), <math>6.81</math> (s, 2H, <math>m\text{-CH}</math>), <math>6.85</math> (s, 2H, <math>m\text{-CH}</math>); <math>^{13}\text{C}</math> NMR (<math>\text{C}_6\text{D}_6</math>, <math>\delta</math>, ppm): <math>19.3</math>, <math>21.1</math>, <math>26.9</math>, <math>28.0</math>, <math>28.1</math>, <math>29.9</math>, <math>30.8</math>, <math>34.3</math> (d, <math>J = 17.7</math> Hz), <math>50.9</math> (d, <math>J = 3.8</math> Hz), <math>126.9</math>, <math>128.5</math>, <math>128.9</math>, <math>129.5</math>, <math>137.5</math>, <math>202.0</math> (d, <math>J = 13.0</math> Hz), <math>217.9</math> (d, <math>J = 89.0</math> Hz); <math>^{31}\text{P}</math> NMR (<math>\text{C}_6\text{D}_6</math>, <math>\delta</math>, ppm): <math>46.80</math> (s, <math>\text{PCy}_3</math>). These spectroscopic data matched those reported in the literature.<sup>6</sup></p>                                                                                                                                                                                                                                                                                                                                                                                                                                                                                                                                                                                                                                                                     |
|  <p><b>Complex II</b></p>   | <p>Yellow-orange solid (78% isolated yield); <math>^1\text{H}</math> NMR (<math>\text{C}_6\text{D}_6</math>, <math>\delta</math>, ppm): <math>-24.82</math> (d, 1H, <math>J_{\text{HH}} = 21.3</math> Hz, Ru-H), <math>2.12</math> (s, 6H, <math>p\text{-CH}_3</math>), <math>1.14 - 2.21</math> (m, 33H, Cy), <math>2.38</math> (s, 6H, <math>o\text{-CH}_3</math>), <math>2.49</math> (s, 6H, <math>o\text{-CH}_3</math>), <math>6.22</math> (s, 2H, <math>\text{NCH=CHN}</math>), <math>6.79</math> (s, 2H, <math>m\text{-CH}</math>), <math>6.83</math> (s, 2H, <math>m\text{-CH}</math>); <math>^{31}\text{P}</math> NMR (<math>\text{C}_6\text{D}_6</math>, <math>\delta</math>, ppm): <math>47.80</math> (s, <math>\text{PCy}_3</math>). These spectroscopic data matched those reported in the literature.<sup>6</sup></p>                                                                                                                                                                                                                                                                                                                                                                                                                                                                                                                                                                                                                                                                                                                                                                                                                                                                                                                                                                                                                                                                                                                                                                                             |
|  <p><b>Complex III</b></p>  | <p>Yellow-orange solid (75% isolated yield); <math>^1\text{H}</math> NMR (<math>\text{CD}_2\text{Cl}_2</math>, <math>\delta</math>, ppm): <math>-24.35</math> (d, 1H, <math>J_{\text{HH}} = 21</math> Hz, Ru-H), <math>1.03\text{-}1.68</math> (m, 33H, <math>\text{PCy}_3</math>), <math>1.26</math> (d, 6H, <math>J_{\text{HH}} = 7.0</math> Hz, <math>\text{CH}(\text{CH}_3)_2</math>), <math>1.29</math> (d, 6H, <math>J_{\text{HH}} = 7.0</math> Hz, <math>\text{CH}(\text{CH}_3)_2</math>), <math>1.38</math> (d, 6H, <math>J_{\text{HH}} = 6.5</math> Hz, <math>\text{CH}(\text{CH}_3)_2</math>), <math>1.44</math> (d, 6H, <math>J_{\text{HH}} = 6.5</math> Hz, <math>\text{CH}(\text{CH}_3)_2</math>), <math>1.95 - 2.02</math> (m, 4H, <math>\text{NCH}_2</math>), <math>3.58</math> (sept, 2H, <math>J_{\text{HH}} = 6.5</math> Hz, <math>\text{CH}(\text{CH}_3)_2</math>), <math>3.70</math> (sept, 2H, <math>J_{\text{HH}} = 6.5</math> Hz, <math>\text{CH}(\text{CH}_3)_2</math>), <math>7.24 - 7.27</math> (m, 4H, <math>m\text{-CH}^{\text{Im}}</math>), <math>7.36</math> (t, 2H, <math>J_{\text{HH}} = 7.0</math> Hz, <math>p\text{-CH}^{\text{Im}}</math>); <math>^{13}\text{C}</math> NMR (<math>\text{CD}_2\text{Cl}_2</math>, <math>\delta</math>, ppm): <math>23.28</math>, <math>23.36</math>, <math>26.69</math>, <math>26.82</math>, <math>26.85</math>, <math>27.85</math>, <math>27.87</math>, <math>27.94</math>, <math>28.82</math>, <math>28.85</math>, <math>29.61</math>, <math>30.33</math>, <math>34.20</math>, <math>34.35</math>, <math>124.07</math>, <math>128.93</math>, <math>136.04</math>, <math>148.33</math>, <math>210.2</math> (d, <math>J = 14.3</math> Hz, Ru-CO), <math>212.4</math> (d, <math>J = 82.3</math> Hz; Ru-CN<sub>2</sub>); <math>^{31}\text{P}</math> NMR (<math>\text{CD}_2\text{Cl}_2</math>, <math>\delta</math>, ppm): <math>47.04</math> (s, <math>\text{PCy}_3</math>). These spectroscopic data matched those reported in the literature.<sup>6</sup></p> |
|  <p><b>Complex IV</b></p> | <p>Yellow-orange solid (88% isolated yield); <math>^1\text{H}</math> NMR (<math>\text{C}_6\text{D}_6</math>, <math>\delta</math>, ppm): <math>-24.74</math> (d, 1H, <math>J_{\text{HH}} = 21</math> Hz, Ru-H), <math>1.05\text{-}1.69</math> (m, 33H, <math>\text{PCy}_3</math>), <math>1.28</math> (d, 6H, <math>J_{\text{HH}} = 7.0</math> Hz, <math>\text{CH}(\text{CH}_3)_2</math>), <math>1.30</math> (d, 6H, <math>J_{\text{HH}} = 7.0</math> Hz, <math>\text{CH}(\text{CH}_3)_2</math>), <math>1.37</math> (d, 6H, <math>J_{\text{HH}} = 6.5</math> Hz, <math>\text{CH}(\text{CH}_3)_2</math>), <math>1.46</math> (d, 6H, <math>J_{\text{HH}} = 6.5</math> Hz, <math>\text{CH}(\text{CH}_3)_2</math>), <math>3.59</math> (sept, 2H, <math>J_{\text{HH}} = 6.5</math> Hz, <math>\text{CH}(\text{CH}_3)_2</math>), <math>3.72</math> (sept, 2H, <math>J_{\text{HH}} = 6.5</math> Hz, <math>\text{CH}(\text{CH}_3)_2</math>), <math>6.24</math> (s, 2H, <math>\text{NCH=CHN}</math>), <math>7.23 - 7.27</math> (m, 4H, <math>m\text{-CH}^{\text{Im}}</math>), <math>7.38</math> (t, 2H, <math>J_{\text{HH}} = 7.0</math> Hz, <math>p\text{-CH}^{\text{Im}}</math>); <math>^{31}\text{P}</math> NMR (<math>\text{C}_6\text{D}_6</math>, <math>\delta</math>, ppm): <math>47.71</math> (s, <math>\text{PCy}_3</math>). These spectroscopic data matched those reported in the literature.<sup>6</sup></p>                                                                                                                                                                                                                                                                                                                                                                                                                                                                                                                                                                                                                    |

### 3. General procedures for the catalytic tests

#### 3.1. Silylative coupling of $\text{ViSi}(\text{OSiMe}_3)_3$ with styrene

An oven-dried 5 mL glass reactor equipped with a reflux condenser and a magnetic stirring bar was charged under argon with  $\text{CH}_2\text{Cl}_2$  (2 mL), tris(trimethylsiloxy)silane (30  $\mu\text{L}$ ,  $8.62 \times 10^{-5}$  mol), dodecane (20  $\mu\text{L}$ ) and styrene (10  $\mu\text{L}$ ,  $8.62 \times 10^{-5}$  mol). The reaction mixture was stirred and heated in an oil bath to maintain a gentle reflux (ca. 45 °C). Then a ruthenium-hydride complex (I-IV) ( $8.62 \times 10^{-7}$  mol) was added to the mixture under argon. After 5 min, copper(I) chloride (0.0004 g,  $4.31 \times 10^{-6}$  mol) was added. The reaction mixture was heated under reflux for 24 h. Conversion of the substrates was monitored by gas chromatography. Reaction yields and selectivities were calculated on the basis of the  $^1\text{H}$  NMR spectra of the reaction mixture.

### **3.2. Silylative coupling of DDSQ-2ViSiMe (1A) with 4-chlorostyrene (2d)**

A 5 mL glass reactor equipped with a reflux condenser and connected to gas and vacuum lines was charged under argon with CH<sub>2</sub>Cl<sub>2</sub> (2 mL), DDSQ-2ViSiMe (**1A**) (0.1 g,  $8.29 \times 10^{-5}$  mol), dodecane (20  $\mu$ L) and 4-chlorostyrene (10  $\mu$ L,  $8.29 \times 10^{-5}$  mol). The mixture was warmed up to 45 °C in an oil bath and ruthenium–hydride complex **III** (0.0007 g,  $8.29 \times 10^{-7}$  mol) was added to the mixture under argon. After 5 min, copper(I) chloride (0.0004 g,  $4.14 \times 10^{-6}$  mol) was added. The reaction mixture was heated under reflux until full conversion of 4-chlorostyrene was detected by TLC (8 h). Reaction yield and selectivity were calculated on the basis of the <sup>1</sup>H NMR spectra of the reaction mixture.

### **3.3. Silylative coupling of DDSQ-2ViSi (1A-C) with styrenes**

A 5 mL glass reactor equipped with a reflux condenser and connected to gas and vacuum lines was charged under argon with CH<sub>2</sub>Cl<sub>2</sub> (2 mL), DDSQ-2ViSi (**1A-C**) ( $8.29 \times 10^{-5}$  mol), an internal standard (decane or dodecane, 20  $\mu$ L) and styrene (**2a-e**) ( $8.29 \times 10^{-5}$  mol). The mixture was warmed up to 45 °C in an oil bath and ruthenium–hydride complex **III** (0.0007 g,  $8.29 \times 10^{-7}$  mol) was added to the mixture under argon. After 5 min, copper(I) chloride (0.0004 g,  $4.14 \times 10^{-6}$  mol) was added. The reaction mixture was heated under reflux until full conversion of styrene (**2a-e**) was detected by TLC. Then the second type of styrene (**3a-e**) ( $8.29 \times 10^{-5}$  mol) was added and the reaction was resumed. Conversion of the styrene (**3a-e**) was monitored by TLC. Reaction yields and selectivities were calculated on the basis of the <sup>1</sup>H NMR spectra of the reaction mixture.

### **4. Synthesis of symmetrically functionalized divinylsilsesquioxanes (4A-a-a and 4A-e-e)**

A 5 mL glass reactor equipped with a reflux condenser and connected to gas and vacuum lines was charged under argon with CH<sub>2</sub>Cl<sub>2</sub> (3 mL), DDSQ-2ViSi (**1A**) ( $1.24 \times 10^{-4}$  mol) and styrene (**2a**) or 4-methoxystyrene (**2e**) ( $2.48 \times 10^{-4}$  mol). The mixture was warmed to 45 °C in an oil bath and ruthenium–hydride complex **III** (0.0010 g,  $1.24 \times 10^{-6}$  mol) was added to the mixture under argon. After 5 min, copper(I) chloride (0.0006 g,  $6.2 \times 10^{-6}$  mol) was added. The reaction mixture was heated under reflux for 8 h. Then the solvent was evaporated under vacuum and cold *n*-hexane (5 mL) was added to the residue to form a colorless precipitate. The precipitate was filtered off and purified by column chromatography (silica gel 60, *n*-hexane/CH<sub>2</sub>Cl<sub>2</sub> = 1/5) to remove ruthenium complexes. Evaporation of the solvent gave an analytically pure sample (white powder).

### **5. General procedure for the synthesis of unsymmetrically functionalized divinyl-silsesquioxanes**

A 25 mL two-necked glass reactor equipped with a reflux condenser and connected to gas and vacuum lines was charged under argon with DDSQ-2ViSi (**1A-C**) ( $2.9 \times 10^{-4}$  mol) and styrene (**2a-e**) ( $2.9 \times 10^{-4}$  mol) and CH<sub>2</sub>Cl<sub>2</sub> (6 mL). The mixture was warmed up to 45 °C in an

oil bath and ruthenium–hydride complex **III** (0.0024 g,  $2.9 \times 10^{-6}$  mol) was added to the mixture under argon. After 5 min, copper(I) chloride (0.0014 g,  $1.45 \times 10^{-5}$  mol) was added. The reaction mixture was heated under reflux until full conversion of styrene (**2a-e**) was detected by TLC. Then the second type of styrene (**3a-e**) ( $2.9 \times 10^{-4}$  mol) was added and the catalytic system was left for night. Then the solvent was evaporated under vacuum and cold *n*-hexane (2 mL) was added to the residue to form a colorless precipitate. The precipitate was filtered off and purified by column chromatography (silica gel 60, *n*-hexane/CH<sub>2</sub>Cl<sub>2</sub> = 1/5) to remove the ruthenium impurities. Evaporation of the solvent gave an analytically pure sample (white powder).

## 6. Analytical data of isolated products

### ***9-(E)-4-Chlorostyrylmethyl-19-(E)-vinylmethyl-1,3,5,7,11,13,15,17-octaphenylpentacyclo-[11.7.1.1<sup>3,11</sup>.1<sup>5,17</sup>.1<sup>7,15</sup>]decasiloxane***

<sup>1</sup>H NMR (CDCl<sub>3</sub>, δ, ppm): 0.38 (s, 3H, CH<sub>3</sub>), 0.44 (s, 3H, CH<sub>3</sub>), 5.78 – 6.33 (m, 3H, H<sub>2</sub>C=CH-Si), 6.45 (d, 2H, *J*<sub>HH</sub> = 19.3 Hz, =CH-Si), 6.89-7.23 and 7.29-7.63 (m, 45H, =CH-C<sub>6</sub>H<sub>4</sub>-Cl and C<sub>6</sub>H<sub>5</sub>)

### ***Di[9,19-(E)-styrylmethyl]-1,3,5,7,11,13,15,17-octaphenylpentacyclo-[11.7.1.1<sup>3,11</sup>.1<sup>5,17</sup>.1<sup>7,15</sup>]-decasiloxane (4A-a-a)***

<sup>1</sup>H NMR (CDCl<sub>3</sub>, δ, ppm): 0.439-0.445 (overlapping s, 6H, CH<sub>3</sub>), 6.44 (d, 2H, *J*<sub>HH</sub> = 19.3 Hz, =CH-Si), 7.12 (d, 2, *J*<sub>HH</sub> = 19.3 Hz, =CH-C<sub>6</sub>H<sub>5</sub>), 6.89-7.6 (m, 50H, C<sub>6</sub>H<sub>5</sub>-); <sup>13</sup>C NMR (CDCl<sub>3</sub>, δ, ppm): -0.79 (CH<sub>3</sub>), 123.94, 126.78, 127.52 (t, *J* = 7.9 Hz), 127.77, 128.38 (d, *J* = 1.7 Hz), 130.11, 130.21, 130.3, 130.34, 130.54, 130.79, 131.93, 133.94, 134.08, 137.50, 146.59; <sup>29</sup>Si NMR (CDCl<sub>3</sub>, δ, ppm): -30.17, -78.30, -79.15, -79.51, -79.84; MS (FD): *m/z* (%): 1379.16 (79), 1380.16 (100), 1381.16 (89), 1382.16 (52), 1383.16 (28); HRMS (FD): calcd. for C<sub>66</sub>H<sub>60</sub>O<sub>14</sub>Si<sub>10</sub>Na: 1379.1574; found: 1379.1569.

### ***Di[9,19-(E)-4-methoxystyrylmethyl]-1,3,5,7,11,13,15,17-octaphenylpentacyclo-[11.7.1.1<sup>3,11</sup>.1<sup>5,17</sup>.1<sup>7,15</sup>]decasiloxane (4A-e-e)***

<sup>1</sup>H NMR (CDCl<sub>3</sub>, δ, ppm): 0.43 (s, 6H, CH<sub>3</sub>), 3.81 (s, 6H, OCH<sub>3</sub>), 6.27 (d, 2H, *J*<sub>HH</sub> = 19.2 Hz, =CH-Si), 6.68 – 6.80 (m, 4H, -C<sub>6</sub>H<sub>4</sub>-OCH<sub>3</sub>), 6.90 – 7.25 (m, 18H, =CH-C<sub>6</sub>H<sub>4</sub>-OCH<sub>3</sub> and C<sub>6</sub>H<sub>5</sub>-), 7.27 – 7.72 (m, 28H, C<sub>6</sub>H<sub>5</sub>-); <sup>13</sup>C NMR (CDCl<sub>3</sub>, δ, ppm): -0.71 (CH<sub>3</sub>), 55.33 (OCH<sub>3</sub>), 113.78, 121.27, 127.55 (t, *J* = 7.0 Hz), 127.79, 128.15, 130.12, 130.22, 130.33, 130.61, 130.73, 130.94, 131.14, 132.07, 134.01, 134.12, 134.15, 146.09, 159.88; <sup>29</sup>Si NMR (CDCl<sub>3</sub>, δ, ppm): -29.82, -78.36, -79.25, -79.57, -79.88.

**9-(E)-4-Bromostyrylmethyl-19-(E)-styrylmethyl-1,3,5,7,11,13,15,17-octaphenylpentacyclo[11.7.1.1<sup>3,11</sup>.1<sup>5,17</sup>.1<sup>7,15</sup>]decasiloxane (4A-a-c)**

<sup>1</sup>H NMR (CDCl<sub>3</sub>, δ, ppm): 0.45 (s, 6H, CH<sub>3</sub>), 6.42 (d, 1H, *J*<sub>HH</sub> = 19.2 Hz, =CH-Si), 6.46 (d, 1H, *J*<sub>HH</sub> = 19.2 Hz, =CH-Si), 6.89 – 7.65 (m, 51H, =CH-C<sub>6</sub>H<sub>5</sub>, =CH-C<sub>6</sub>H<sub>4</sub>-Br and C<sub>6</sub>H<sub>5</sub>); <sup>13</sup>C NMR (CDCl<sub>3</sub>, δ, ppm): -0.80 (CH<sub>3</sub>), -0.74 (CH<sub>3</sub>), 122.28, 122.31, 122.32, 122.33, 123.97, 124.02, 125.02, 125.06, 126.84, 127.50, 127.53, 127.58, 127.59, 127.62, 127.63, 127.66, 127.72, 127.83, 127.86, 127.90, 128.29, 128.42, 128.44, 129.76, 130.26, 130.29, 130.39, 130.41, 130.45, 130.47, 130.59, 130.62, 130.79 (d, *J* = 3.6 Hz), 130.85 (d, *J* = 3.6 Hz), 131.04, 131.10, 131.49, 131.51, 131.85, 131.91, 131.95, 132.00, 133.98 (d, *J* = 1.5 Hz), 134.00 (d, *J* = 1.5 Hz), 134.08, 134.11, 134.14, 134.22, 134.23, 136.50 (d, *J* = 2.3 Hz), 137.58 (d, *J* = 2.3 Hz), 145.26, 145.27, 146.67, 165.42, 165.46; <sup>29</sup>Si NMR (CDCl<sub>3</sub>, δ, ppm): -29.80, -30.19, -78.31, -78.35, -79.52, -79.56; MS (FD): *m/z*(%): 1456.11 (11), 1457.06 (47), 1458.07 (62), 1459.07 (100), 1460.07 (91), 1461.07 (68), 1462.07 (40), 1463.07 (29), 1464.07 (11); HRMS (FD): calcd. for C<sub>66</sub>H<sub>59</sub>BrO<sub>14</sub>NaSi<sub>10</sub>: 1457.0679; found: 1457.0704.

**9-(E)-4-Methoxystyrylmethyl-19-(E)-styrylmethyl-1,3,5,7,11,13,15,17-octaphenylpentacyclo[11.7.1.1<sup>3,11</sup>.1<sup>5,17</sup>.1<sup>7,15</sup>]decasiloxane (4A-a-e)**

<sup>1</sup>H NMR (CDCl<sub>3</sub>, δ, ppm): 0.42 – 0.47 (overlapping s, 6H, CH<sub>3</sub>), 3.83 (s, 3H, OCH<sub>3</sub>), 6.28 (d, 1H, *J*<sub>HH</sub> = 19.2 Hz, =CH-Si), 6.46 (d, 1H, *J*<sub>HH</sub> = 19.3 Hz, =CH-Si), 6.76 (d, 2H, *J*<sub>HH</sub> = 8.5 Hz, -C<sub>6</sub>H<sub>4</sub>-OCH<sub>3</sub>), 6.71 – 7.79 (m, 49H, =CH-C<sub>6</sub>H<sub>5</sub>, =CH-C<sub>6</sub>H<sub>4</sub>-OCH<sub>3</sub> and C<sub>6</sub>H<sub>5</sub>); <sup>13</sup>C NMR (CDCl<sub>3</sub>, δ, ppm): -0.75 (CH<sub>3</sub>), -0.71 (CH<sub>3</sub>), -55.33 (OCH<sub>3</sub>), 113.79, 121.26, 124.02, 126.84, 127.50, 127.57, 127.64, 127.80, 127.82, 128.16, 128.44, 130.14, 130.24, 130.35, 130.38, 130.62, 130.68, 130.74, 130.88 (d, *J* = 2.4 Hz), 130.94 (d, *J* = 2.4 Hz), 131.13, 132.01 (d, *J* = 1.7 Hz), 132.08 (d, *J* = 1.7 Hz), 134.02, 134.14, 134.16, 137.59, 146.10, 146.66, 159.90; <sup>29</sup>Si NMR (CDCl<sub>3</sub>, δ, ppm): -30.12, -30.18, -30.47, -30.52, -78.28, -78.30, -79.48, -79.51, -79.55, -79.58; MS (FD): *m/z* (%): 1409.17 (82), 1410.16 (100), 1411.17 (99), 1412.17 (62), 1413.17 (33), 1414.16 (18), 1415.16 (11), 1417.19 (13); HRMS (FD): calcd. for C<sub>67</sub>H<sub>62</sub>O<sub>16</sub>NaSi<sub>10</sub>: 1409.1679; found: 1409.1667.

**9-(E)-4-Methylstyrylmethyl-19-(E)-4-methoxystyrylmethyl-1,3,5,7,11,13,15,17-octaphenylpentacyclo[11.7.1.1<sup>3,11</sup>.1<sup>5,17</sup>.1<sup>7,15</sup>]decasiloxane (4A-b-e)**

<sup>1</sup>H NMR (CDCl<sub>3</sub>, δ, ppm): 0.45 (s, 6H, CH<sub>3</sub>), 2.36 (s, 3H, -C<sub>6</sub>H<sub>4</sub>-CH<sub>3</sub>), 3.83 (s, 3H, OCH<sub>3</sub>), 6.29 (d, 1H, *J*<sub>HH</sub> = 19.2 Hz, =CH-Si), 6.39 (d, 1H, *J*<sub>HH</sub> = 19.1 Hz, =CH-Si), 6.76 (d, 2H, *J*<sub>HH</sub> = 8.4 Hz, -C<sub>6</sub>H<sub>4</sub>-), 6.77 (d, 2H, *J*<sub>HH</sub> = 8.6 Hz, -C<sub>6</sub>H<sub>4</sub>-), 6.91 – 7.82 (m, 46H, =CH-C<sub>6</sub>H<sub>4</sub>-OCH<sub>3</sub>, =CH-C<sub>6</sub>H<sub>4</sub>-CH<sub>3</sub> and C<sub>6</sub>H<sub>5</sub>); <sup>13</sup>C NMR (CDCl<sub>3</sub>, δ, ppm): -0.71 (br s, CH<sub>3</sub>), 21.30 (-C<sub>6</sub>H<sub>4</sub>-CH<sub>3</sub>), 55.34 (OCH<sub>3</sub>), 113.79, 121.28, 122.69, 126.79, 127.50, 127.57, 127.65, 127.68, 127.81, 128.17, 129.13, 130.14, 130.24, 130.35, 130.63, 130.93, 130.96, 131.16, 132.06, 132.09, 134.03, 134.07, 134.95, 138.38, 146.11, 146.60, 159.91; <sup>29</sup>Si NMR (CDCl<sub>3</sub>, δ, ppm): -29.80, -29.95, -78.33 (br s), -79.54 (br s); MS (FD): *m/z*(%): 1423.18 (81), 1424.17 (100), 1425.18 (89), 1426.18 (62), 1427.18

(31), 1428.18 (18), 1429.17 (10); HRMS (FD): calcd. for  $C_{68}H_{64}O_{15}NaSi_{10}$ : 1423.1711; found: 1423.1782.

**9-(E)-4-Bromostyrylmethyl-19-(E)-4-methoxystyrylmethyl-1,3,5,7,11,13,15,17-octaphenylpentacyclo[11.7.1.1<sup>3,11</sup>.1<sup>5,17</sup>.1<sup>7,15</sup>]decasiloxane (4A-c-e)**

$^1H$  NMR ( $CDCl_3$ ,  $\delta$ , ppm): 0.44 – 0.48 (overlapping s, 6H,  $CH_3$ ), 3.84 (s, 3H,  $OCH_3$ ), 6.30 (d, 1H,  $J_{HH} = 19.3$  Hz,  $=CH-Si$ ), 6.47 (d, 1H,  $J_{HH} = 19.2$  Hz,  $=CH-Si$ ), 6.78 (d, 2H,  $J_{HH} = 8.7$  Hz,  $-C_6H_4-$ ), 6.92 (m, 48H,  $=CH-C_6H_4-OCH_3$ ,  $=CH-C_6H_4-Br$  and  $C_6H_5$ );  $^{13}C$  NMR ( $CDCl_3$ ,  $\delta$ , ppm): -0.74 ( $CH_3$ ), -0.72 ( $CH_3$ ), -55.34 ( $OCH_3$ ), 113.79, 121.27, 124.03, 126.84, 127.57 (d,  $J = 7.4$  Hz), 127.64, 127.80, 127.82, 128.16, 128.44, 130.14, 130.24, 130.35, 130.38, 130.62, 130.88 (d,  $J = 2.5$  Hz), 130.94 (d,  $J = 2.3$  Hz), 132.01 (d,  $J = 1.9$  Hz), 132.08 (d,  $J = 1.8$  Hz), 134.02 (br s), 134.15 (d,  $J = 1.9$  Hz), 137.59, 146.11, 146.66, 159.89, 159.90;  $^{29}Si$  NMR ( $CDCl_3$ ,  $\delta$ , ppm): -29.81, -30.20, -78.31, -78.35, -79.20, -79.24, -79.63, -79.56, -79.86; MS (FD):  $m/z$ (%): 1487.08 (52), 1488.08 (65), 1489.08 (99), 1490.08 (100), 1491.08 (78), 1492.08 (45), 1493.08 (29), 1494.07 (13); HRMS (FD): calcd. for  $C_{67}H_{61}BrO_{15}NaSi_{10}$ : 1487.0804; found: 1487.0801.

**9-(E)-4-Chlorostyrylmethyl-19-(E)-4-methoxystyrylmethyl-1,3,5,7,11,13,15,17-octaphenylpentacyclo[11.7.1.1<sup>3,11</sup>.1<sup>5,17</sup>.1<sup>7,15</sup>]decasiloxane (4A-d-e)**

$^1H$  NMR ( $CDCl_3$ ,  $\delta$ , ppm): 0.45 (s, 6H,  $CH_3$ ), 3.83 (s, 3H,  $OCH_3$ ), 6.29 (d, 1H,  $J_{HH} = 19.5$  Hz,  $=CH-Si$ ), 6.40 (d, 1H,  $J_{HH} = 19.4$  Hz,  $=CH-Si$ ), 6.77 (d, 2H,  $J_{HH} = 8.6$  Hz,  $-C_6H_4-$ ), 6.92 – 7.82 (m, 48H,  $=CH-C_6H_4-OCH_3$ ,  $=CH-C_6H_4-Cl$  and  $C_6H_5$ );  $^{13}C$  NMR ( $CDCl_3$ ,  $\delta$ , ppm): -0.80, -0.72, 55.33, 113.77, 121.20, 121.26, 124.83, 124.88, 127.55, 127.57, 127.58, 127.59, 127.78, 127.79, 127.83, 127.84, 127.98, 128.15, 128.54, 129.74, 130.21, 130.25, 130.33, 130.36, 130.42, 130.45, 130.58, 130.60, 130.86, 130.93, 131.85, 131.92, 132.00, 132.07, 133.97, 134.00, 134.10, 134.14, 136.07, 145.18, 145.20, 146.09, 146.11, 159.89, 159.93, 165.40, 165.44;  $^{29}Si$  NMR ( $CDCl_3$ ,  $\delta$ , ppm): -29.75, -29.82, -30.46, -30.53, -78.29, -78.36, -79.53, -79.57, -79.69; MS (FD):  $m/z$ (%): 1439.18 (71), 1440.18 (85), 1441.19 (70), 1442.18 (51), 1443.13 (90), 1444.13 (100), 1445.13 (98), 1446.13 (89), 1447.14 (59), 1448.13 (38), 1449.09 (30), 1450.08 (22), 1451.08 (23), 1452.07 (19).

**9-(E)-Styrylphenyl-19-(E)-4-methylstyrylphenyl-1,3,5,7,11,13,15,17-octaphenylpentacyclo[11.7.1.1<sup>3,11</sup>.1<sup>5,17</sup>.1<sup>7,15</sup>]decasiloxane (4B-a-b)**

$^1H$  NMR ( $CDCl_3$ ,  $\delta$ , ppm): 2.35 (s, 3H,  $CH_3$ ), 6.51 (d, 1H,  $J_{HH} = 19.2$  Hz,  $=CH-Si$ ), 6.58 (d, 1H,  $J_{HH} = 19.2$  Hz,  $=CH-Si$ ), 7.00 – 7.84 and 8.07 – 8.29 (m, 61H,  $=CH-C_6H_5$ ,  $=CH-C_6H_4-OCH_3$  and  $C_6H_5$ );  $^{13}C$  NMR ( $CDCl_3$ ,  $\delta$ , ppm): 21.29 ( $CH_3$ ), 120.96, 122.35, 126.90, 126.95, 127.41, 127.48, 127.56, 127.84 (br s), 128.42, 128.56, 129.11, 129.75, 130.09, 130.16, 130.20, 130.42, 130.44, 130.60, 130.64, 130.65, 130.80, 137.74 (d,  $J = 1.6$  Hz), 131.78 (d,  $J = 1.6$  Hz), 134.07, 134.16, 134.62, 134.63, 134.77, 134.82, 137.46, 138.54, 148.14, 148.18, 165.46;  $^{29}Si$  NMR ( $CDCl_3$ ,  $\delta$ , ppm): -44.28, -44.55, -77.99, -78.03, -79.38, -79.39, -79.50; MS (FD):  $m/z$  (%):



1517.20 (42), 1518.21 (52), 1519.20 (60), 1520.16 (100), 1521.16 (98), 1522.17 (71), 1523.17 (40), 1524.17 (20), 1525.17 (10); HRMS (FD): calcd. for  $C_{77}H_{66}O_{14}NaSi_{10}$ : 1517.2043; found: 1517.2041.

**9-(E)-Styrylphenyl-19-(E)-4-methoxystyrylphenyl-1,3,5,7,11,13,15,17-octaphenylpentacyclo[11.7.1.1<sup>3,11</sup>.1<sup>5,17</sup>.1<sup>7,15</sup>]decasiloxane (4B-a-e)**

$^1H$  NMR ( $CDCl_3$ ,  $\delta$ , ppm): 3.82 (s, 3H,  $OCH_3$ ), 6.43 (d, 1H,  $J_{HH} = 19.0$  Hz, =CH-Si), 6.57 (d, 1H,  $J_{HH} = 19.0$  Hz, =CH-Si), 6.75 (d, 2H,  $J_{HH} = 8.5$  Hz,  $-C_6H_4-OCH_3$ ), 6.95 – 7.80 (m, 58H, =CH- $C_6H_5$ , =CH- $C_6H_4-OCH_3$  and  $C_6H_5$ );  $^{13}C$  NMR ( $CDCl_3$ ,  $\delta$ , ppm): 55.32 ( $OCH_3$ ), 113.77, 119.52, 122.36, 126.95, 127.40, 127.47, 127.48, 127.56, 127.63, 127.71, 127.81, 127.83, 127.85, 127.89, 128.30, 128.41, 128.55, 130.06, 130.15, 130.18, 130.20, 130.40, 130.43, 130.51, 130.60, 130.62, 130.68, 130.74, 130.79, 131.74 (d,  $J = 2.9$  Hz), 131.81 (d,  $J = 2.9$  Hz), 134.06, 134.07, 134.12, 134.15, 134.17, 134.19, 134.21, 134.62, 134.63, 134.85, 134.86, 137.46, 147.60, 148.13, 160.01 (br s);  $^{29}Si$  NMR ( $CDCl_3$ ,  $\delta$ , ppm): -43.60, -43.87, -78.09, -78.13, -79.47, -79.50, -79.56; MS (FD):  $m/z$  (%): 1533.20 (75), 1534.20 (99), 1435.20 (100), 1536.21(69), 1537.20 (39), 1538.19 (16), 1539.21 (10); HRMS (FD): calcd. for  $C_{77}H_{66}O_{15}NaSi_{10}$ : 1533.1992; found: 1533.2014.

**9-(E)-4-Bromostyrylphenyl-19-(E)-4-methoxystyrylphenyl-1,3,5,7,11,13,15,17-octaphenylpentacyclo[11.7.1.1<sup>3,11</sup>.1<sup>5,17</sup>.1<sup>7,15</sup>]decasiloxane (4B-c-e)**

$^1H$  NMR ( $CDCl_3$ ,  $\delta$ , ppm): 3.82 (s, 3H,  $OCH_3$ ), 6.40 (d, 1H,  $J_{HH} = 19.6$  Hz, =CH-Si), 6.52 (d, 1H,  $J_{HH} = 19.7$  Hz, =CH-Si), 6.75 (d, 2H,  $J_{HH} = 7.7$  Hz,  $-C_6H_4-$ ), 6.97 – 7.80 (m, 58H, =CH- $C_6H_4-Br$ , =CH- $C_6H_4-OCH_3$  and  $C_6H_5$ );  $^{13}C$  NMR ( $CDCl_3$ ,  $\delta$ , ppm): 55.33 ( $OCH_3$ ), 113.77, 119.46, 119.52, 122.47, 122.49, 123.45, 123.51, 127.40, 127.42, 127.44, 127.49, 127.51, 127.52, 127.55, 127.60, 127.64, 127.66, 127.83, 127.88, 127.89, 127.92, 128.11, 128.31, 128.40, 130.08, 130.09, 130.21, 130.24, 130.28, 130.32, 130.36, 130.41, 130.44, 130.51, 130.54, 130.60, 130.50, 131.52, 131.59, 131.66, 131.74, 131.82, 134.05, 134.07, 134.08, 134.12, 134.13, 134.17, 134.22, 134.83, 134.87, 136.38, 146.66, 147.62, 160.01, 160.04;  $^{29}Si$  NMR ( $CDCl_3$ ,  $\delta$ , ppm): -44.05, -44.11, -44.84, -44.90, -77.94, -78.04, -79.39, -79.40 -79.45, -79.48; MS (FD):  $m/z$  (%): 1611.10 (49), 1612.10 (60), 1613.11 (99), 1614.10 (100), 1615.10 (77), 1616.11 (48), 1617.11 (25), 1618.12 (12); HRMS (FD): calcd. for  $C_{77}H_{65}BrO_{15}NaSi_{10}$ : 1611.1097; found: 1611.1062.

**9-(E)-4-Chlorostyrylphenyl-19-(E)-4-methoxystyrylphenyl-1,3,5,7,11,13,15,17-octaphenylpentacyclo[11.7.1.1<sup>3,11</sup>.1<sup>5,17</sup>.1<sup>7,15</sup>]decasiloxane (4B-d-e)**

$^1H$  NMR ( $CDCl_3$ ,  $\delta$ , ppm): 3.82 (s, 3H,  $OCH_3$ ), 6.40 (d, 1H,  $J_{HH} = 19.6$  Hz, =CH-Si), 6.52 (d, 1H,  $J_{HH} = 19.7$  Hz, =CH-Si), 6.75 (d, 2H,  $J_{HH} = 7.7$  Hz,  $-C_6H_4-$ ), 6.95 – 7.80 (m, 58H, =CH- $C_6H_4-Cl$ , =CH- $C_6H_4-OCH_3$  and  $C_6H_5$ );  $^{13}C$  NMR ( $CDCl_3$ ,  $\delta$ , ppm): 55.30 ( $OCH_3$ ), 113.77, 119.46, 119.52, 123.25, 123.32, 127.40, 127.42, 127.44, 127.48, 127.51, 127.52, 127.54, 127.56, 127.59,

127.63, 127.64, 127.66, 127.72, 127.76, 127.82, 127.83, 127.87, 127.89, 127.91, 128.11, 128.31, 128.54, 128.56, 129.76, 130.07, 130.09, 130.20, 130.21, 130.24, 130.27, 130.31, 130.33, 130.36, 130.41, 130.44, 130.50, 130.54, 130.60, 130.66, 130.68, 130.74, 130.75, 130.79, 130.80, 131.59, 131.67, 131.74, 131.81, 134.04, 134.05, 134.07, 134.08, 134.12, 134.13, 134.16, 134.17, 134.22, 134.36, 134.82, 134.86, 135.95, 146.61, 147.60, 147.61, 160.00, 160.03;  $^{29}\text{Si}$  NMR ( $\text{CDCl}_3$ ,  $\delta$ , ppm): -44.06, -44.89, -77.94, -78.05, -79.37, -79.39, -79.42; MS (FD):  $m/z$  (%): 1563.21 (46), 1564.21 (59), 1565.20 (65), 1567.16 (71), 1568.16 (90), 1569.16 (100), 1570.16 (89), 1571.16 (59), 1572.16 (40), 1573.12 (45), 1574.11 (34), 1575.12 (30), 1575.12 (19).

**9-(E)-4-Methylstyryl-4-methoxyphenyl-19-(E)-styryl-4-methoxyphenyl-1,3,5,7,11,13,15,17-octaphenylpentacyclo[11.7.1.1<sup>3,11</sup>.1<sup>5,17</sup>.1<sup>7,15</sup>]decasiloxane (4C-a-b)**

$^1\text{H}$  NMR ( $\text{CDCl}_3$ ,  $\delta$ , ppm): 2.35 (s, 3H,  $\text{CH}_3$ ), 3.79 (s, 3H,  $\text{OCH}_3$ ), 3.80 (s, 3H,  $\text{OCH}_3$ ), 6.51 (d, 1H,  $J_{\text{HH}} = 19.2$  Hz,  $=\text{CH-Si}$ ), 6.58 (d, 1H,  $J_{\text{HH}} = 19.2$  Hz,  $=\text{CH-Si}$ ), 6.46 – 6.53 and 6.97 – 7.71 (m, 59H,  $=\text{CH-C}_6\text{H}_4\text{-OCH}_3$ ,  $=\text{CH-C}_6\text{H}_4\text{-CH}_3$  and  $\text{C}_6\text{H}_5$ );  $^{13}\text{C}$  NMR ( $\text{CDCl}_3$ ,  $\delta$ , ppm): 21.27 ( $\text{CH}_3$ ), 54.96 ( $\text{OCH}_3$ ), 54.97 ( $\text{OCH}_3$ ), 113.55, 113.85, 121.37, 121.38, 122.75, 122.77, 125.77, 125.78, 125.92, 125.93, 126.88, 126.93, 127.34, 127.35, 127.44 (br s), 127.54 (br s), 127.81, 127.83, 128.40, 128.49, 129.09, 129.75, 130.18, 130.20, 130.37, 130.40, 130.69, 130.70, 130.73, 131.84, 131.86, 131.88, 131.89, 134.07, 134.19, 134.91, 135.83, 137.55, 138.44, 147.86, 147.90, 161.22, 161.27;  $^{29}\text{Si}$  NMR ( $\text{CDCl}_3$ ,  $\delta$ , ppm): -43.60, -43.87, -78.09, -78.13, -79.47, -79.50, -79.56; MS (FD):  $m/z$ (%): 1577.23 (71), 1578.22 (100), 1579.22 (98), 1580.19 (90), 1581.19 (78), 1582.18 (60), 1583.18 (40), 1584.19 (20), 1585.18 (10); HRMS (FD): calcd. for  $\text{C}_{79}\text{H}_{70}\text{O}_{16}\text{NaSi}_{10}$ : 1577.2254; found: 1577.222.

**9-(E)-4-Bromostyryl-4-methoxyphenyl-19-(E)-styryl-4-methoxyphenyl-1,3,5,7,11,13,15,17-octaphenylpentacyclo[11.7.1.1<sup>3,11</sup>.1<sup>5,17</sup>.1<sup>7,15</sup>]decasiloxane (4C-a-c)**

$^1\text{H}$  NMR ( $\text{CDCl}_3$ ,  $\delta$ , ppm): 3.79 (s, 6H,  $\text{OCH}_3$ ), 6.53 (d, 1H,  $J_{\text{HH}} = 19.2$  Hz,  $=\text{CH-Si}$ ), 6.57 (d, 1H,  $J_{\text{HH}} = 19.2$  Hz,  $=\text{CH-Si}$ ), 6.82 (d, 4H,  $J_{\text{HH}} = 8.1$  Hz,  $-\text{C}_6\text{H}_4-$ ), 6.96 – 7.70 (m, 55H,  $=\text{CH-C}_6\text{H}_4\text{-Br}$ ,  $=\text{CH-C}_6\text{H}_5$ ,  $-\text{C}_6\text{H}_4\text{-OCH}_3$  and  $\text{C}_6\text{H}_5$ );  $^{13}\text{C}$  NMR ( $\text{CDCl}_3$ ,  $\delta$ , ppm): 55.33 ( $\text{OCH}_3$ ), 113.77, 113.78, 119.46, 119.52, 123.25, 123.32, 127.40, 127.42, 127.44, 127.48, 127.51, 127.52, 127.54, 127.56, 127.59, 127.63, 127.64, 127.66, 127.72, 127.76, 127.82, 127.83, 127.87, 127.89, 127.91, 128.11, 128.31, 128.54, 128.56, 129.76, 130.07, 130.09, 130.20, 130.21, 130.24, 130.27, 130.31, 130.33, 130.36, 130.41, 130.44, 130.50, 130.54, 130.60, 130.66, 130.68, 130.74, 130.75, 130.79, 130.80, 131.59, 131.67, 131.74, 131.81, 134.04, 134.05, 134.07, 134.08, 134.10, 134.12, 134.13, 134.16, 134.17, 134.22, 134.82, 134.86, 135.95, 135.96, 146.61, 146.62, 147.60, 147.61, 160.00, 160.03;  $^{29}\text{Si}$  NMR ( $\text{CDCl}_3$ ,  $\delta$ , ppm): -43.79, -43.86, -44.15, -44.20, -78.02, -78.07, -79.43, -79.46, -79.49, -79.52; MS (FD):  $m/z$  (%): 16.41 (49), 1642.12 (62), 1643.12 (100), 1644.12 (99), 1645.13 (72), 1646.12 (48), 1647.12 (25), 1648.11 (13); HRMS (FD): calcd. for  $\text{C}_{78}\text{H}_{67}\text{BrO}_{16}\text{NaSi}_{10}$ : 1641.1203; found: 1641.1255.

**9-(E)-4-Chlorostyryl-4-methoxyphenyl-19-(E)-styryl-4-methoxyphenyl-1,3,5,7,11,13,15,17-octaphenylpentacyclo[11.7.1.1<sup>3,11</sup>.1<sup>5,17</sup>.1<sup>7,15</sup>]decasiloxane (4C-a-d)**

<sup>1</sup>H NMR (CDCl<sub>3</sub>, δ, ppm): 3.79 (s, 6H, OCH<sub>3</sub>), 3.82 (s, 3H, OCH<sub>3</sub>), 6.39 (d, 1H, *J*<sub>HH</sub> = 19.3 Hz, =CH-Si), 6.57 (d, 1H, *J*<sub>HH</sub> = 19.3 Hz, =CH-Si), 6.45 – 6.59 and 6.94 – 7.68 (m, 59H, =CH-C<sub>6</sub>H<sub>5</sub>, =CH-C<sub>6</sub>H<sub>4</sub>-OCH<sub>3</sub> and C<sub>6</sub>H<sub>5</sub>); <sup>13</sup>C NMR (CDCl<sub>3</sub>, δ, ppm): 54.98 (OCH<sub>3</sub>), 54.99 (OCH<sub>3</sub>), 113.56 (d, *J* = 3.8 Hz), 113.76, 122.70, 122.74, 123.66, 123.71, 125.73, 125.75, 127.37, 127.45, 127.46, 127.48, 127.55, 127.57, 127.60, 127.63, 127.84, 127.86, 128.09, 128.40, 128.53, 128.54, 130.21, 130.23, 130.30, 130.36, 130.41, 130.43, 130.47, 130.49, 130.62, 130.67, 131.71, 131.75, 131.78, 131.83, 134.04, 134.06, 134.17, 134.18, 135.79, 135.82, 137.53, 137.54, 146.32, 146.42, 147.90, 161.27, 161.34; <sup>29</sup>Si NMR (CDCl<sub>3</sub>, δ, ppm): -43.82, -43.87, -78.04, -78.09, -79.48, -79.51; MS (FD): *m/z* (%): 1597.17 (65), 1598.17 (88), 1599.17 (100), 1600.18 (72), 1601.17 (52), 1602.18 (38), 1603.17 (18), 1604.16 (11); HRMS (FD): calcd. for C<sub>78</sub>H<sub>67</sub>ClO<sub>16</sub>NaSi<sub>10</sub>: 1597.1708; found: 1597.1708.

**9-(E)-4-Methoxystyryl-4-methoxyphenyl-19-(E)-styryl-4-methoxyphenyl-1,3,5,7,11,13,15,17-octaphenylpentacyclo[11.7.1.1<sup>3,11</sup>.1<sup>5,17</sup>.1<sup>7,15</sup>]decasiloxane (4C-a-e)**

<sup>1</sup>H NMR (CDCl<sub>3</sub>, δ, ppm): 3.79 (s, 6H, OCH<sub>3</sub>), 3.82 (s, 3H, OCH<sub>3</sub>), 6.39 (d, 1H, *J*<sub>HH</sub> = 19.3 Hz, =CH-Si), 6.57 (d, 1H, *J*<sub>HH</sub> = 19.3 Hz, =CH-Si), 6.70 – 6.81 (m, 6H, -C<sub>6</sub>H<sub>4</sub>-), 6.94 – 7.68 (m, 53H, =CH-C<sub>6</sub>H<sub>5</sub>, =CH-C<sub>6</sub>H<sub>4</sub>-OCH<sub>3</sub>, -C<sub>6</sub>H<sub>4</sub>-OCH<sub>3</sub> and C<sub>6</sub>H<sub>5</sub>); <sup>13</sup>C NMR (CDCl<sub>3</sub>, δ, ppm): 54.97 (OCH<sub>3</sub>), 55.32 (OCH<sub>3</sub>), 113.56 (d, *J* = 3.8 Hz), 113.76, 119.93, 122.76, 125.76, 125.77, 126.93, 127.35, 127.45, 127.55, 127.82 (d, *J* = 1.9 Hz), 128.27, 128.41, 128.50, 130.19, 130.39 (d, *J* = 2.9 Hz), 130.58, 130.69 (d, *J* = 2.3 Hz), 130.75 (d, *J* = 2.0 Hz), 131.84 (d, *J* = 1.9 Hz), 131.91 (d, *J* = 1.8 Hz), 134.08 (d, *J* = 1.0 Hz), 134.20 (d, *J* = 1.5 Hz), 135.83, 147.37, 147.89, 159.96, 161.20, 161.26; <sup>29</sup>Si NMR (CDCl<sub>3</sub>, δ, ppm): -43.44, -43.87, -78.09, -78.14, -79.48, -79.52, -79.58; MS (FD): *m/z* (%): 1593.22 (72), 1594.22 (100), 1595.22 (91), 1596.22 (68), 1597.22 (37), 1598.21 (20), 1599.21 (12); HRMS (FD): calcd. for C<sub>79</sub>H<sub>70</sub>O<sub>17</sub>NaSi<sub>10</sub>: 1593.2203; found: 1593.2178

**9-(E)-4-Bromostyryl-4-methoxyphenyl-19-(E)-4-methylstyryl-4-methoxyphenyl-1,3,5,7,11,13,15,17-octaphenylpentacyclo[11.7.1.1<sup>3,11</sup>.1<sup>5,17</sup>.1<sup>7,15</sup>]decasiloxane (4C-b-c)**

<sup>1</sup>H NMR (CDCl<sub>3</sub>, δ, ppm): 2.32 (s, 3H, CH<sub>3</sub>), 3.77 (s, 6H, OCH<sub>3</sub>), 6.47 (d, 1H, *J*<sub>HH</sub> = 18.9 Hz, =CH-Si), 6.50 (d, 1H, *J*<sub>HH</sub> = 18.9 Hz, =CH-Si), 6.72 – 6.84 (m, 4H, -C<sub>6</sub>H<sub>4</sub>-CH<sub>3</sub> i -C<sub>6</sub>H<sub>4</sub>-Br), 6.93 – 7.68 (m, 54H, =CH-C<sub>6</sub>H<sub>4</sub>-Br, =CH-C<sub>6</sub>H<sub>4</sub>-CH<sub>3</sub>, -C<sub>6</sub>H<sub>4</sub>-OCH<sub>3</sub> and C<sub>6</sub>H<sub>5</sub>); <sup>13</sup>C NMR (CDCl<sub>3</sub>, δ, ppm): 21.31 (CH<sub>3</sub>), 55.01 (OCH<sub>3</sub>), 113.57, 113.66, 121.33, 121.39, 122.40, 122.42, 123.87, 123.93, 125.43, 125.46, 125.89, 125.94, 126.89, 127.38, 127.39, 127.45, 127.47, 127.49, 127.52, 127.55, 127.59, 127.63, 127.84, 127.89, 128.40, 129.12, 130.23, 130.32, 130.39, 130.42, 130.49, 130.52, 130.61, 130.65, 130.68, 130.71, 130.75, 131.50, 131.71, 131.78, 131.83, 131.91, 134.06, 134.09, 134.19, 134.92, 135.81, 135.85, 136.48, 138.48, 138.52, 146.45, 147.89, 161.24, 161.37; <sup>29</sup>Si NMR (CDCl<sub>3</sub>, δ, ppm): -43.53, -43.59, -44.15, -44.21, -78.02, -78.11, -79.48 (br s); MS (FD): *m/z* (%): 1655.13 (47), 1656.13 (65), 1657.16 (99), 1658.16

(100), 1659.13 (81), 1660.14 (49), 1661.14 (29), 1662.13 (18), 1663.11 (10); HRMS (FD): calcd. for C<sub>79</sub>H<sub>69</sub>BrO<sub>16</sub>NaSi<sub>10</sub>: 1655.1359; found: 1655.1377.

## 7. References

- <sup>1</sup> A. J. Arduengo III, R. Krafczyk, R. Schmutzler, H. A. Craig, J. N. Goerlich, W. J. Marshall, M. Unverzagt, *Tetrahedron*, **1999**, *55*, 14523-14534.
- <sup>2</sup> L. Delaude, M. Szypa, A. Demonceau, A. F. Noels, *Adv. Synth. Catal.*, **2002**, *344*, 749-756.
- <sup>3</sup> M. Hans, J. Lorkowski, A. Demonceau, L. Delaude, *Beilstein J. Org. Chem.* **2015**, *11*, 2318-2325.
- <sup>4</sup> J. Levison, S. D. Robinson, *J. Chem. Soc. A.*, **1970**, 2947-2954.
- <sup>5</sup> P. Żak, B. Dudziec, M. Kubicki, B. Marciniak, *Chem. Eur. J.*, **2014**, *20*, 9387 – 9393.
- <sup>6</sup> Y. Mutoh, Y. Mohara, S. Saito, *Org. Lett.*, **2017**, *19*, 5204–5207.

## 8. NMR spectra of isolated products

### 8.1. Symmetrically functionalized divinylsilsesquioxanes

$^1\text{H}$  NMR ( $\text{CDCl}_3$ ,  $\delta$ , ppm)

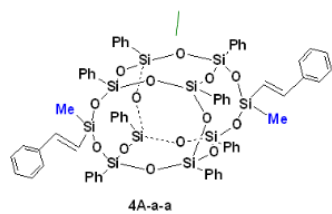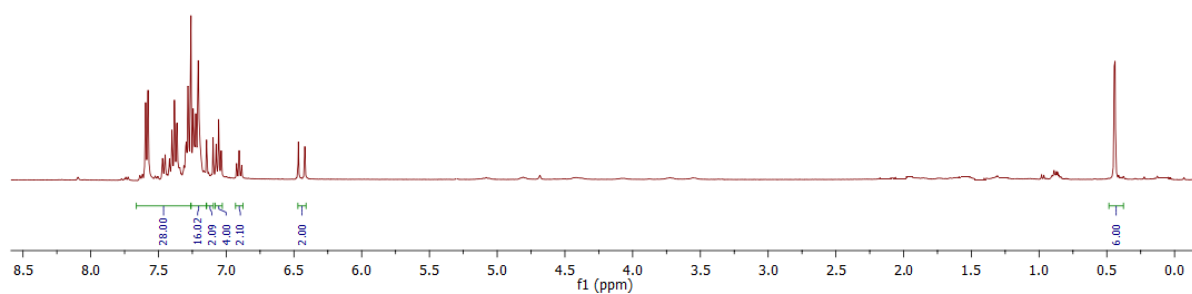

$^{13}\text{C}$  NMR ( $\text{CDCl}_3$ ,  $\delta$ , ppm)

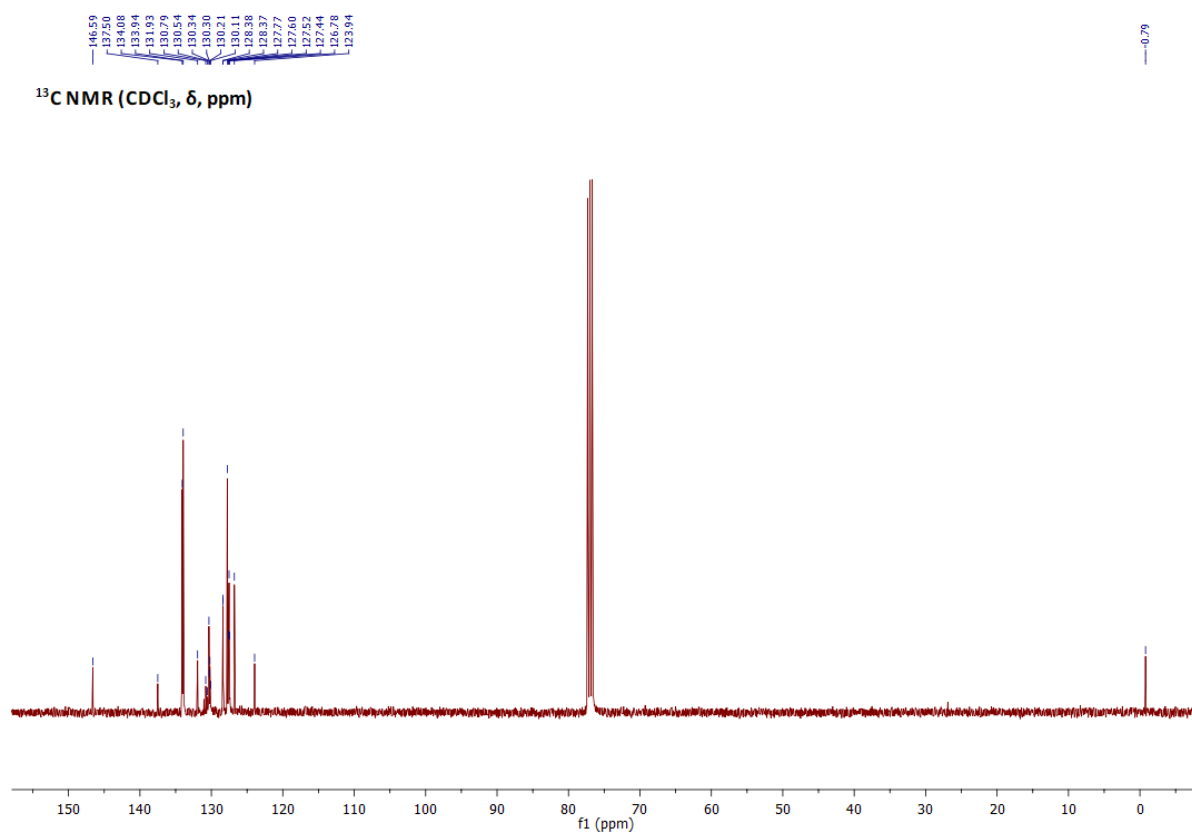

$^{29}\text{Si}$  NMR ( $\text{CDCl}_3$ ,  $\delta$ , ppm)

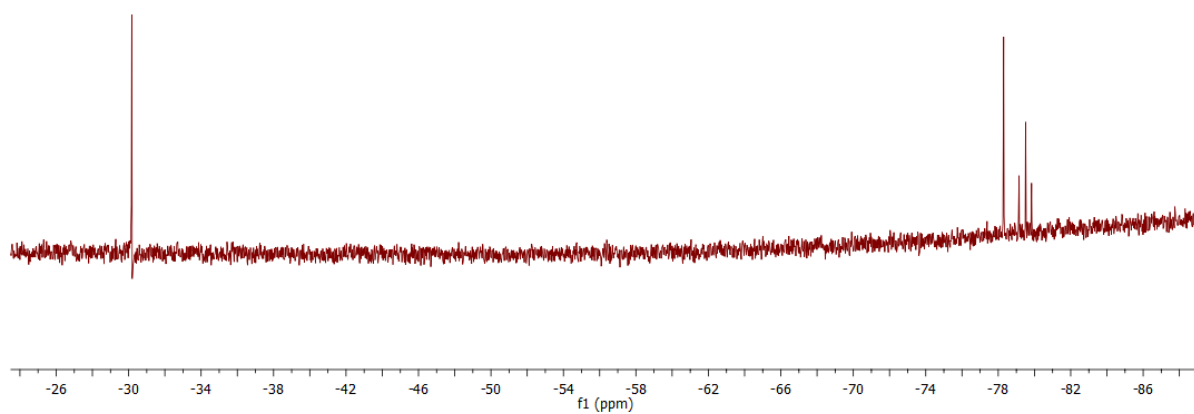

$^1\text{H}$  NMR ( $\text{CDCl}_3$ ,  $\delta$ , ppm)

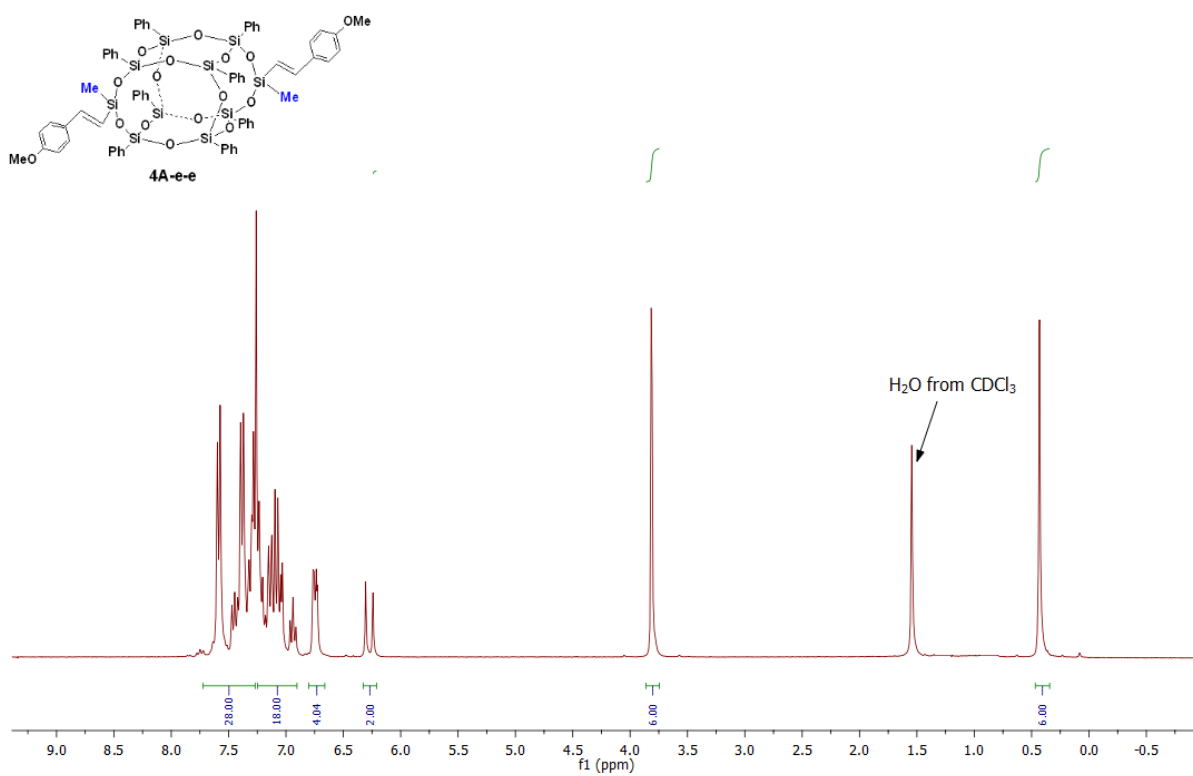

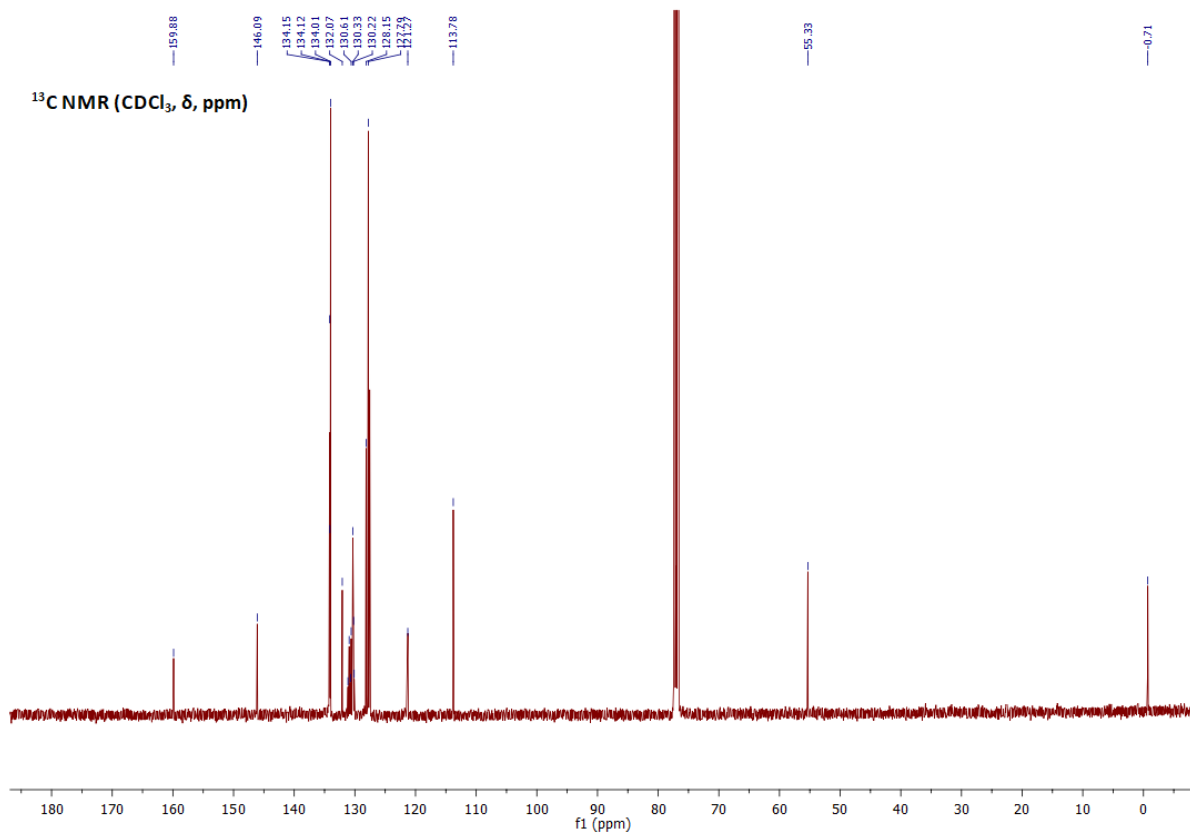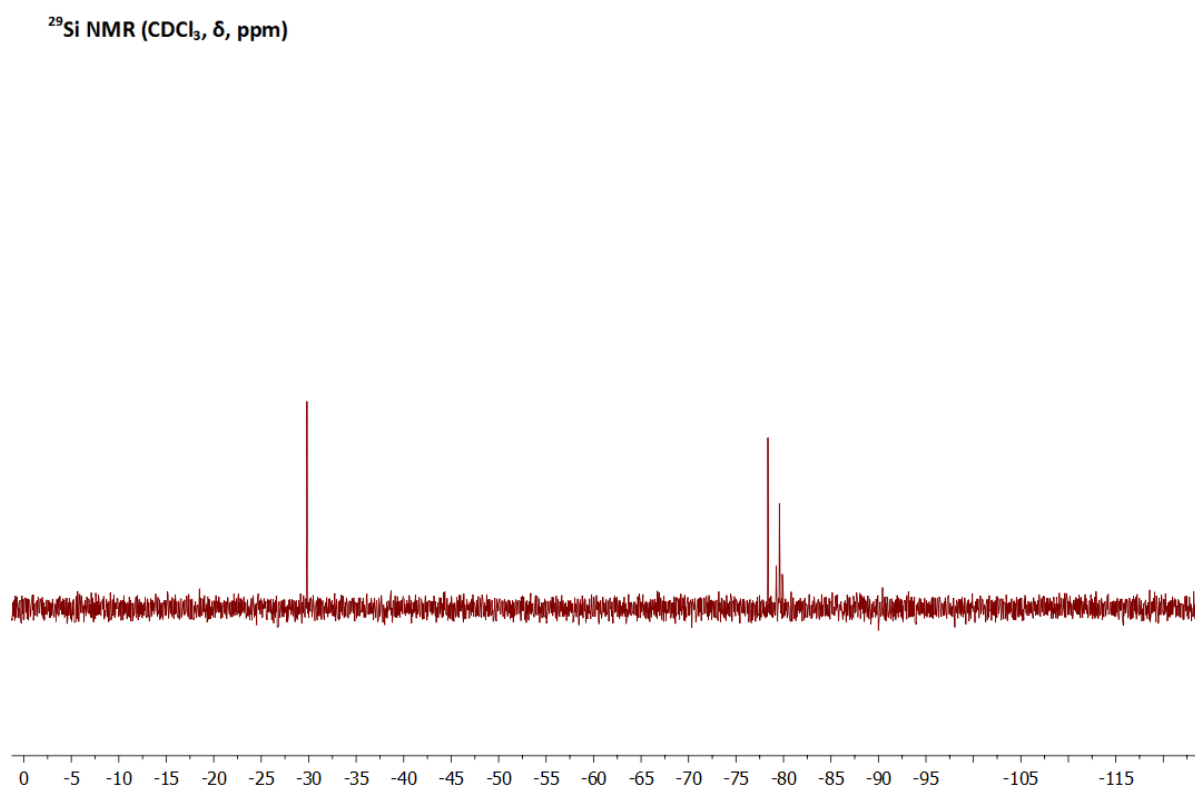

## 8.2. Unsymmetrically functionalized divinylsilsesquioxanes

$^1\text{H}$  NMR ( $\text{CDCl}_3$ ,  $\delta$ , ppm)

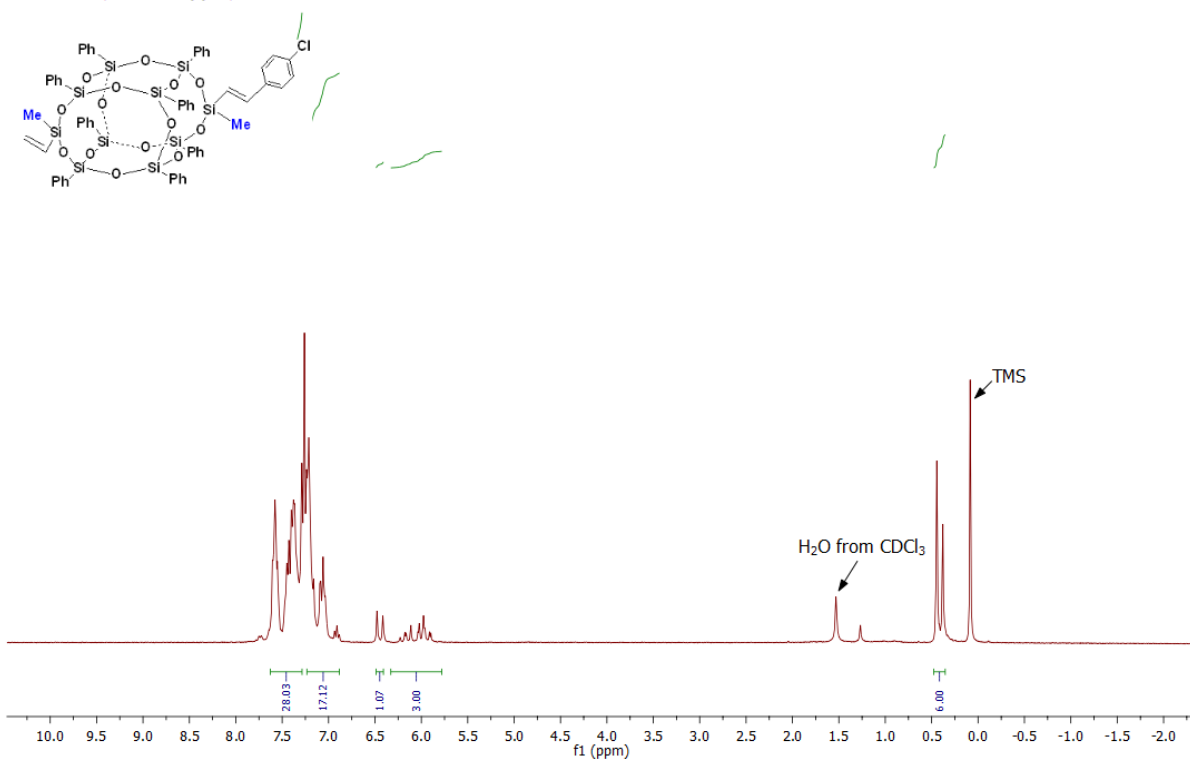

$^1\text{H}$  NMR ( $\text{CDCl}_3$ ,  $\delta$ , ppm)

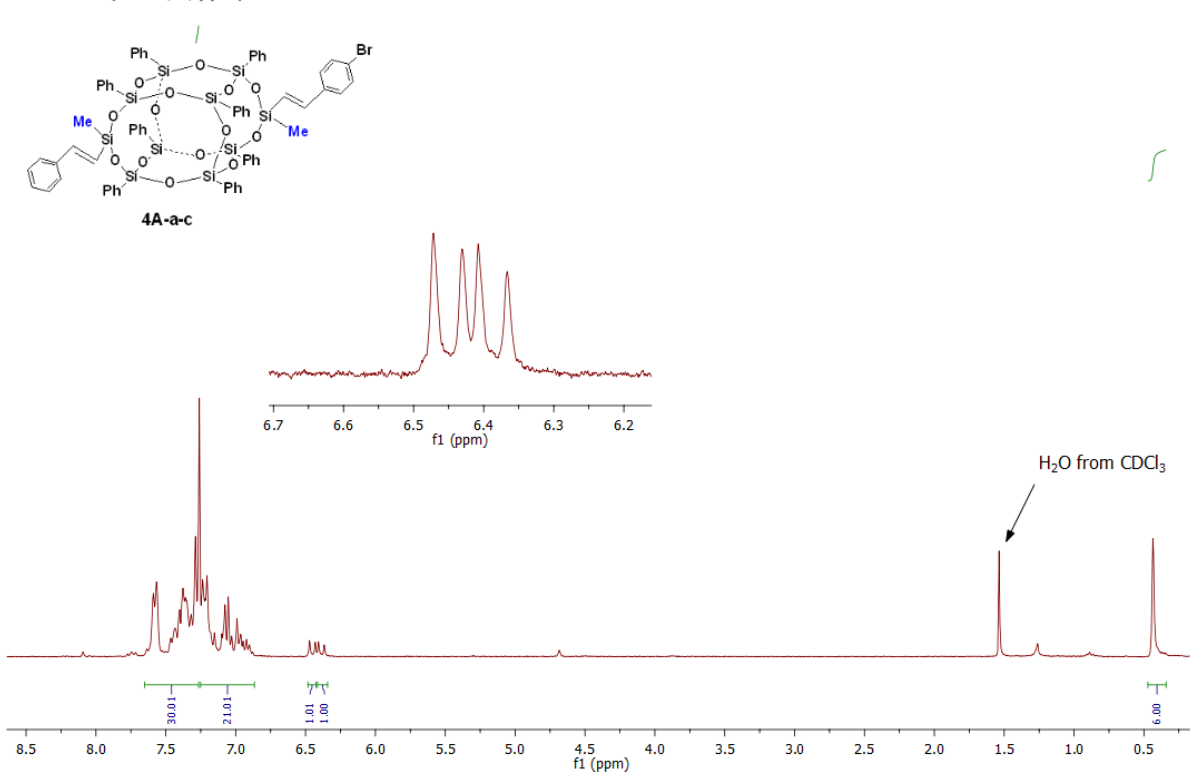



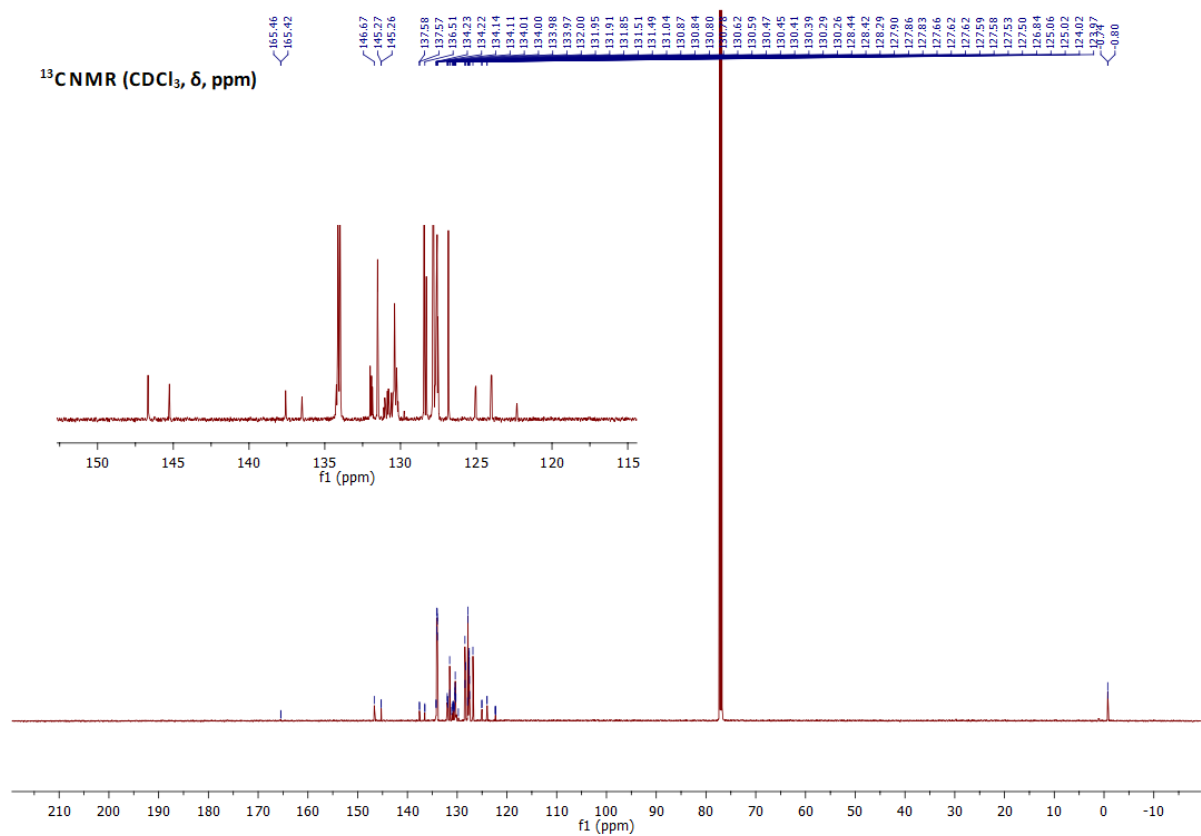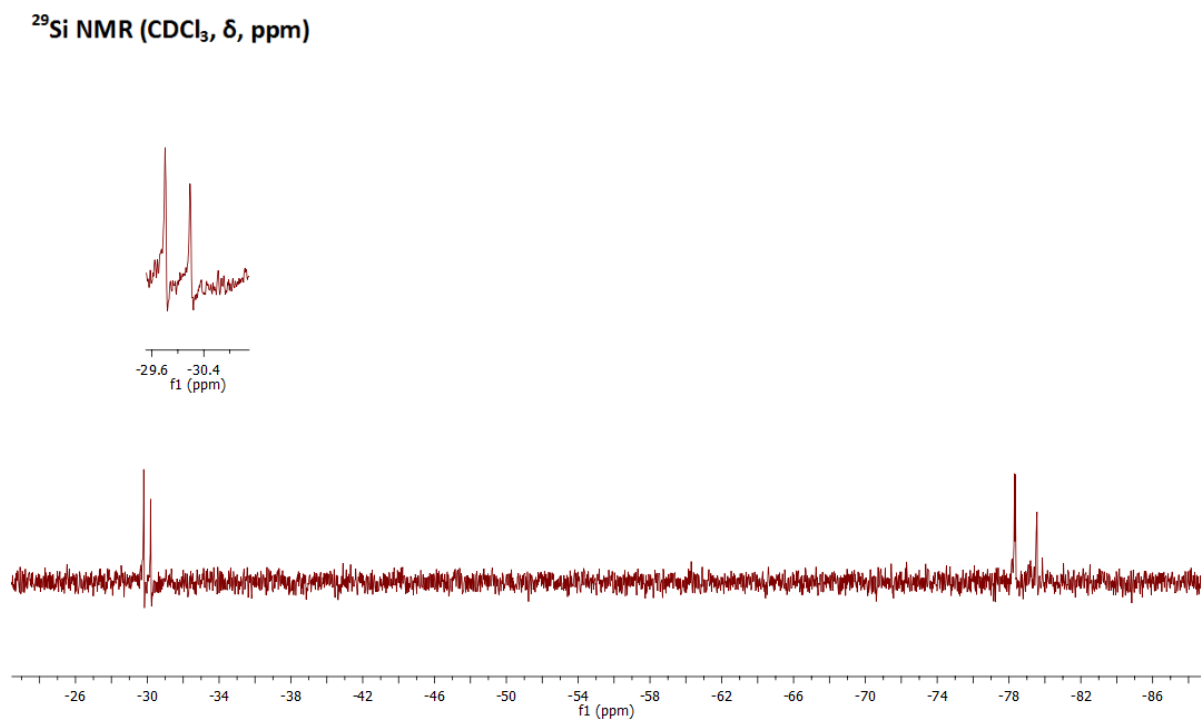

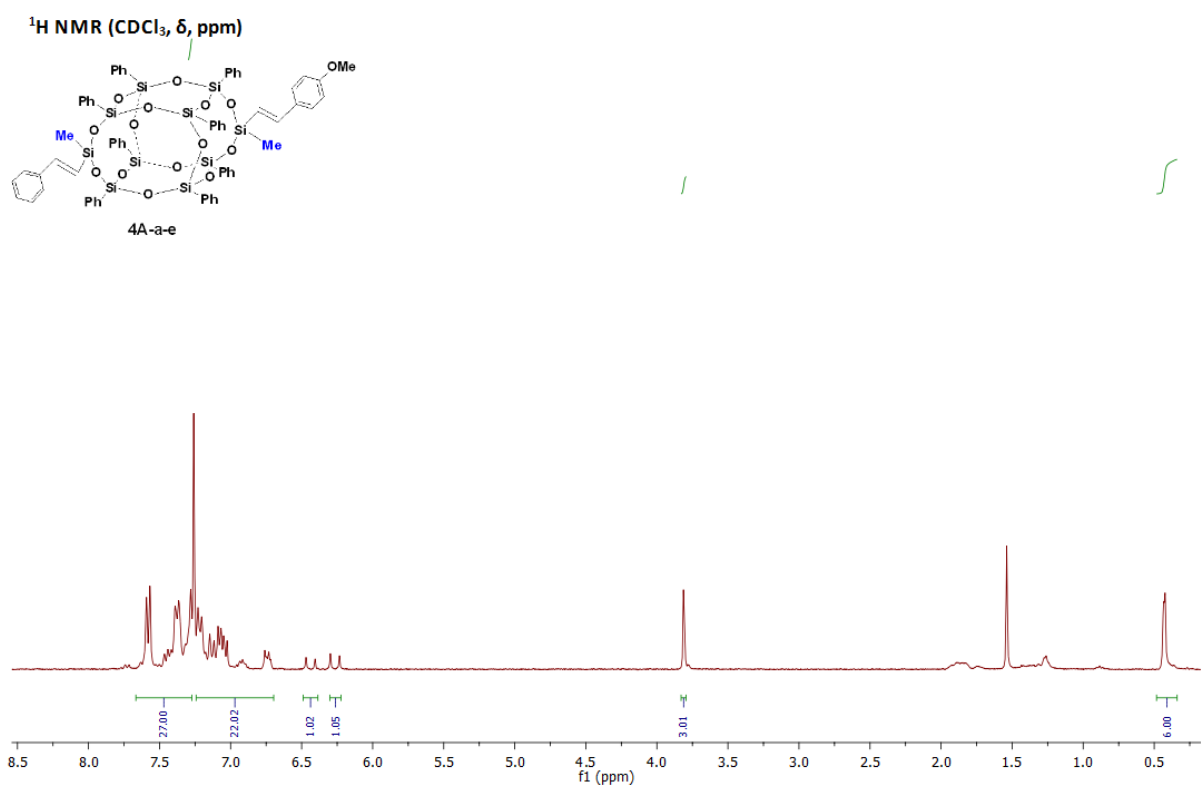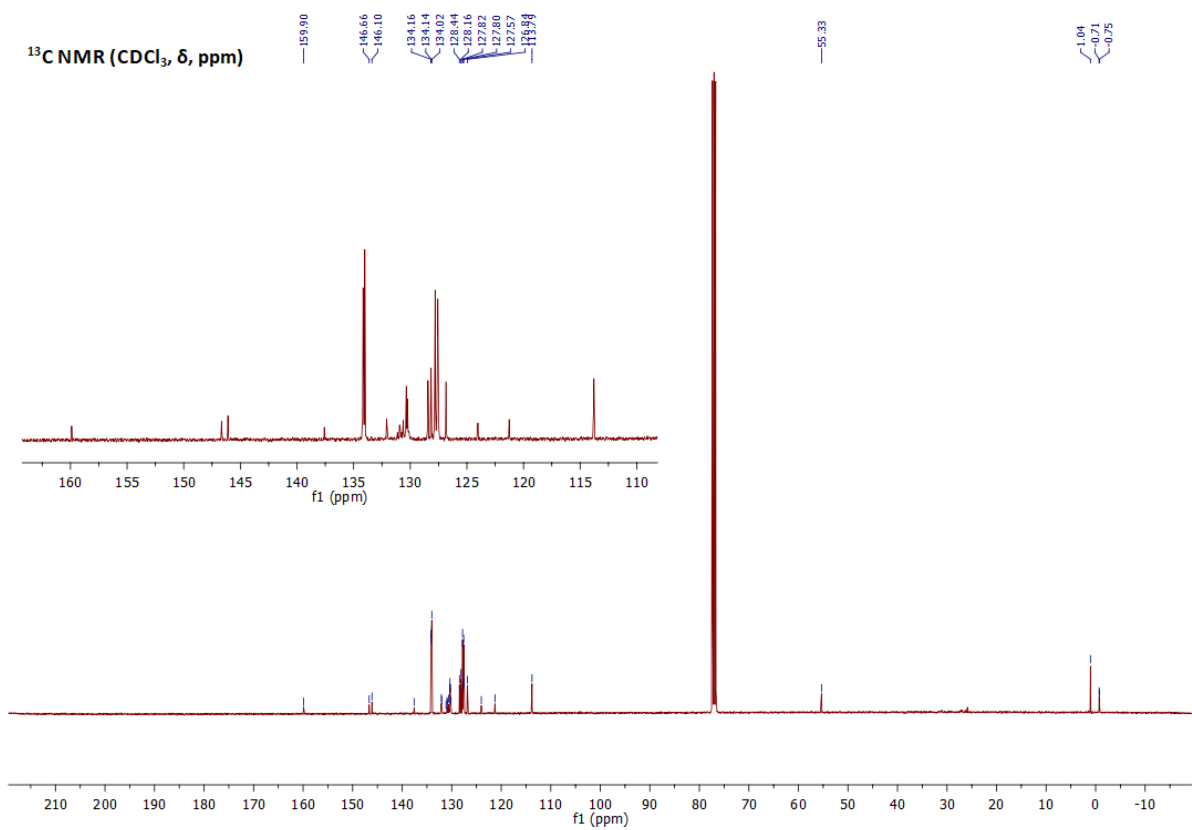

$^{29}\text{Si}$  NMR ( $\text{CDCl}_3$ ,  $\delta$ , ppm)

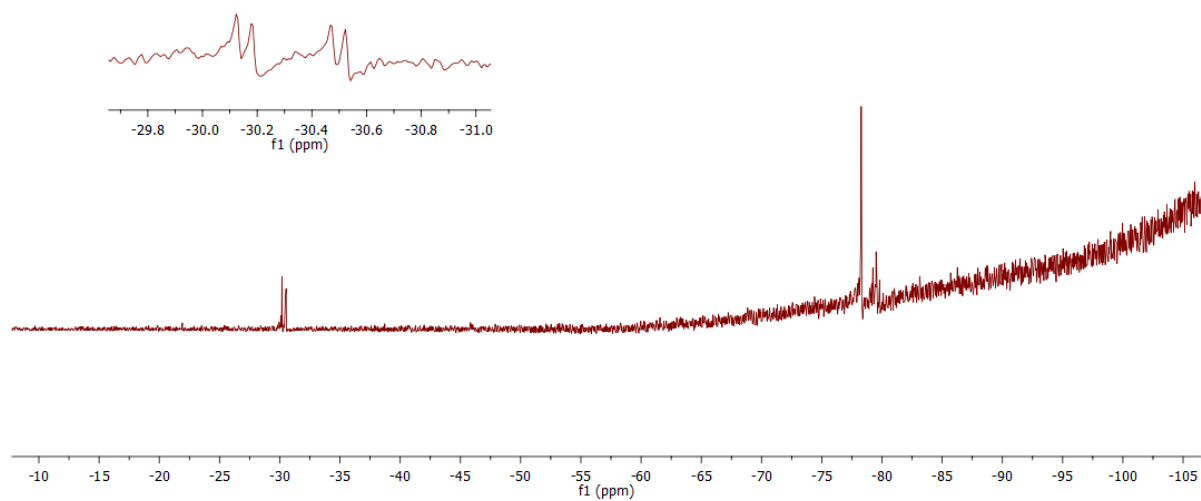

$^1\text{H}$  NMR ( $\text{CDCl}_3$ ,  $\delta$ , ppm)

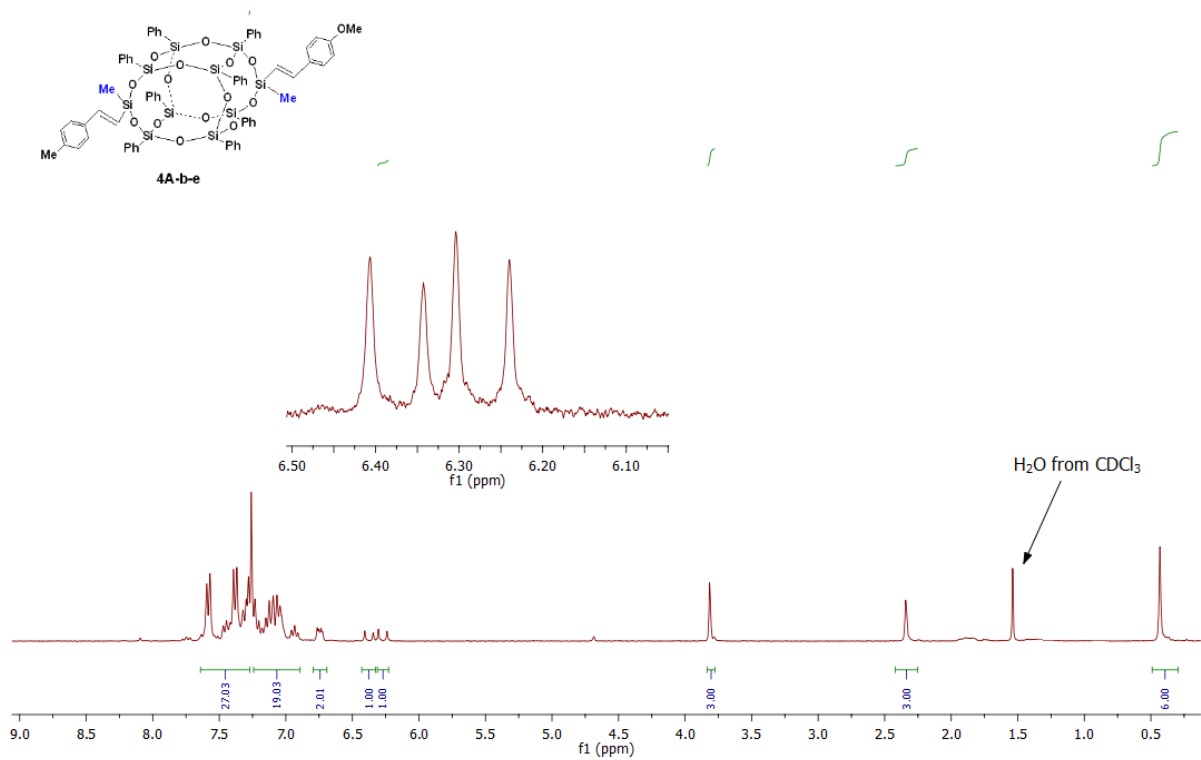

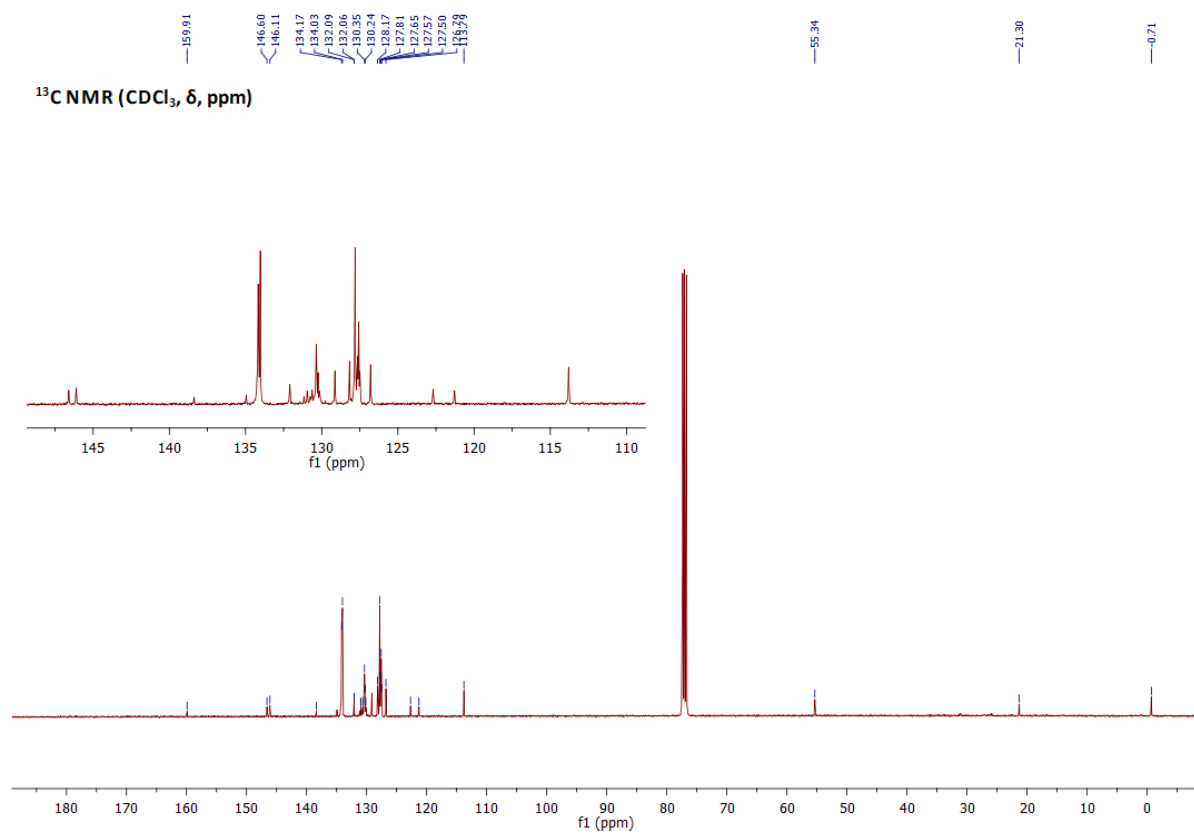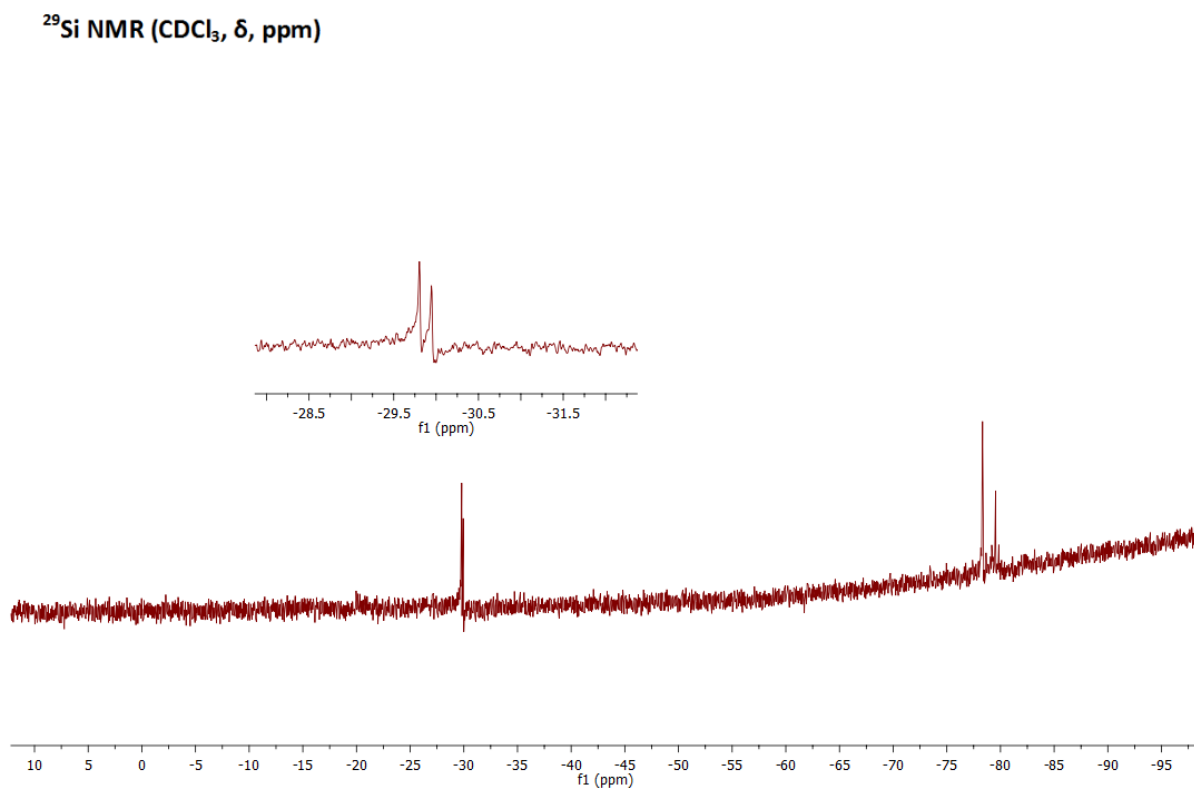

$^1\text{H}$  NMR ( $\text{CDCl}_3$ ,  $\delta$ , ppm)

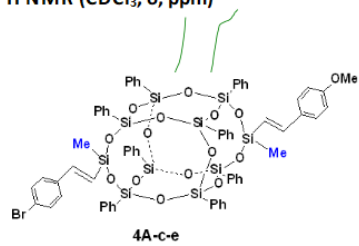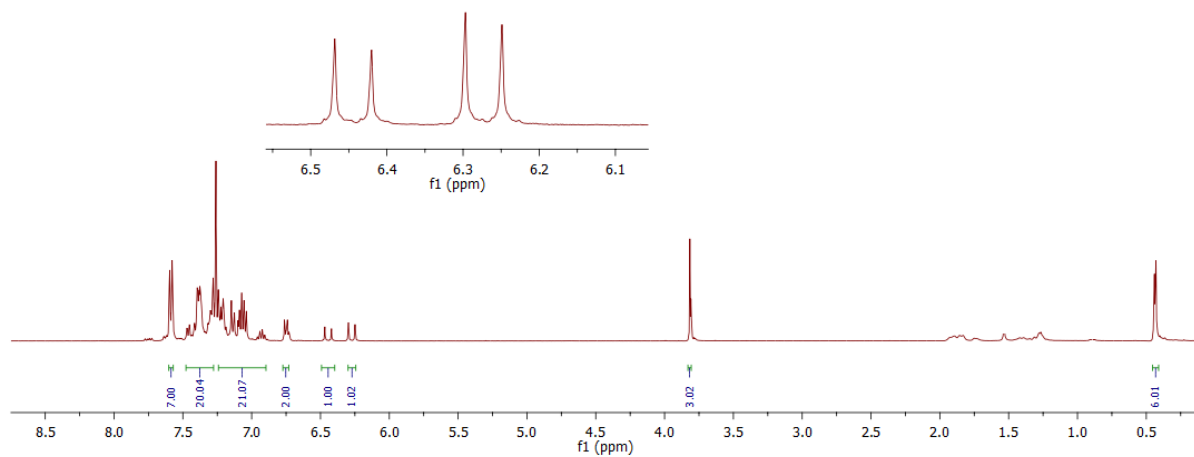

$^{13}\text{C}$  NMR ( $\text{CDCl}_3$ ,  $\delta$ , ppm)

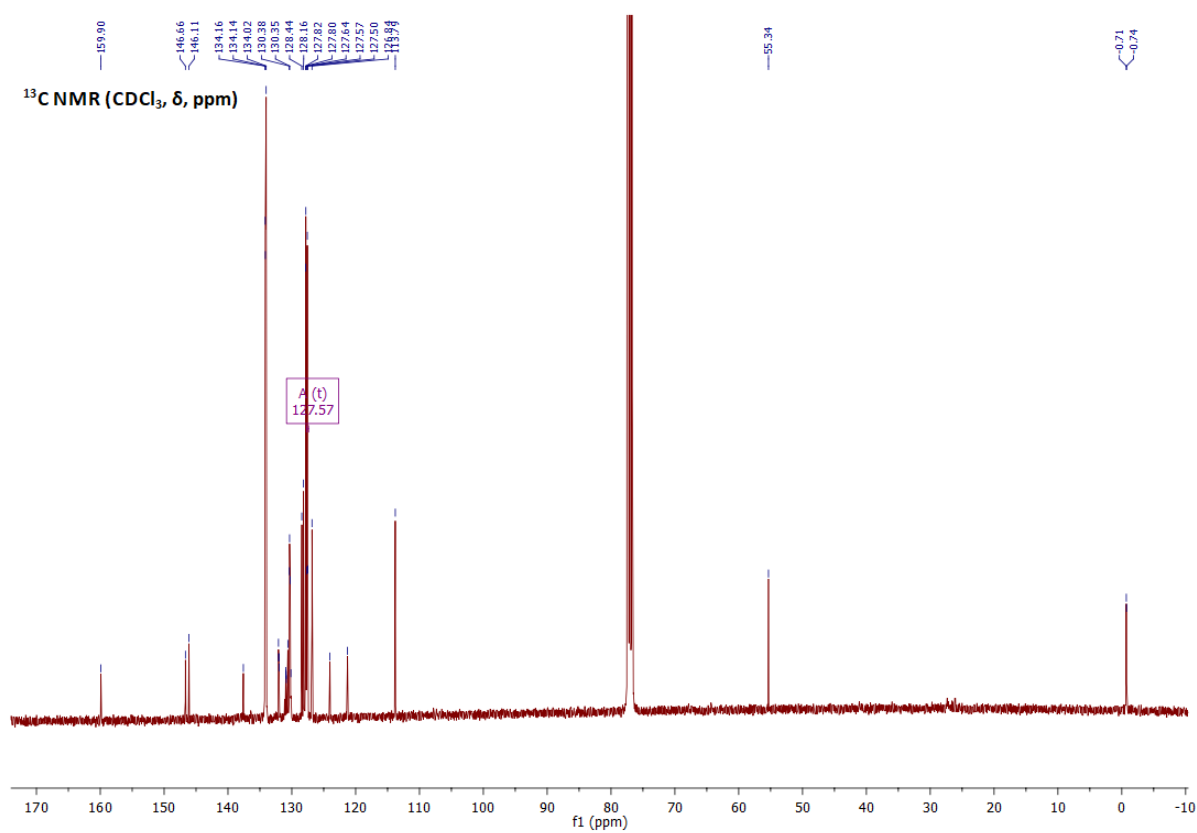

$^{29}\text{Si}$  NMR ( $\text{CDCl}_3$ ,  $\delta$ , ppm)

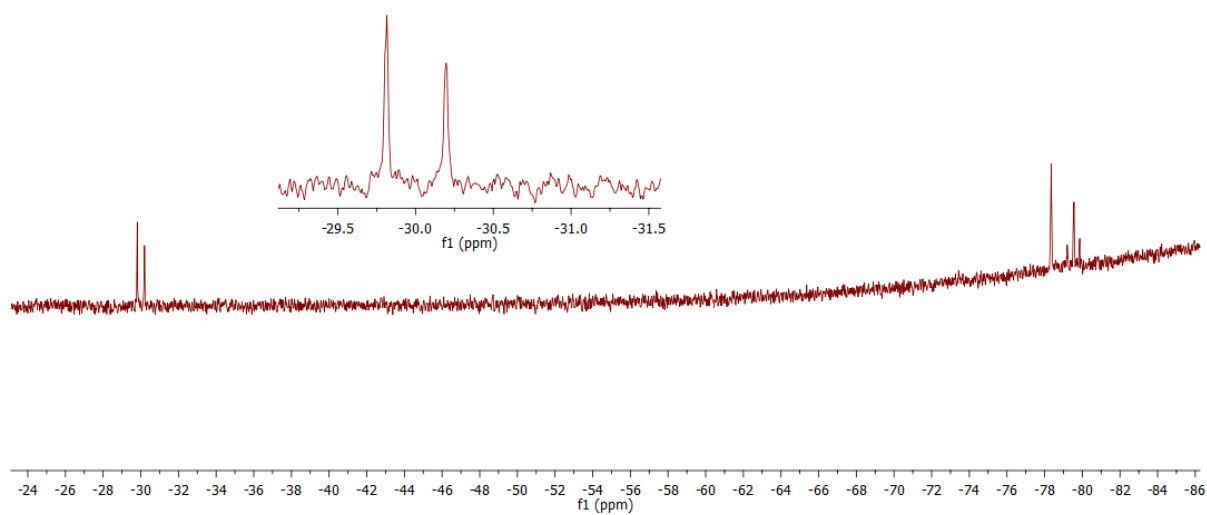

$^1\text{H}$  NMR ( $\text{CDCl}_3$ ,  $\delta$ , ppm)

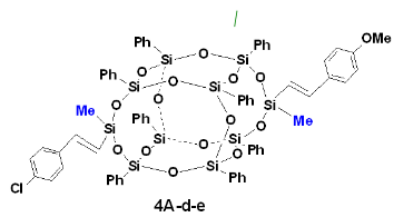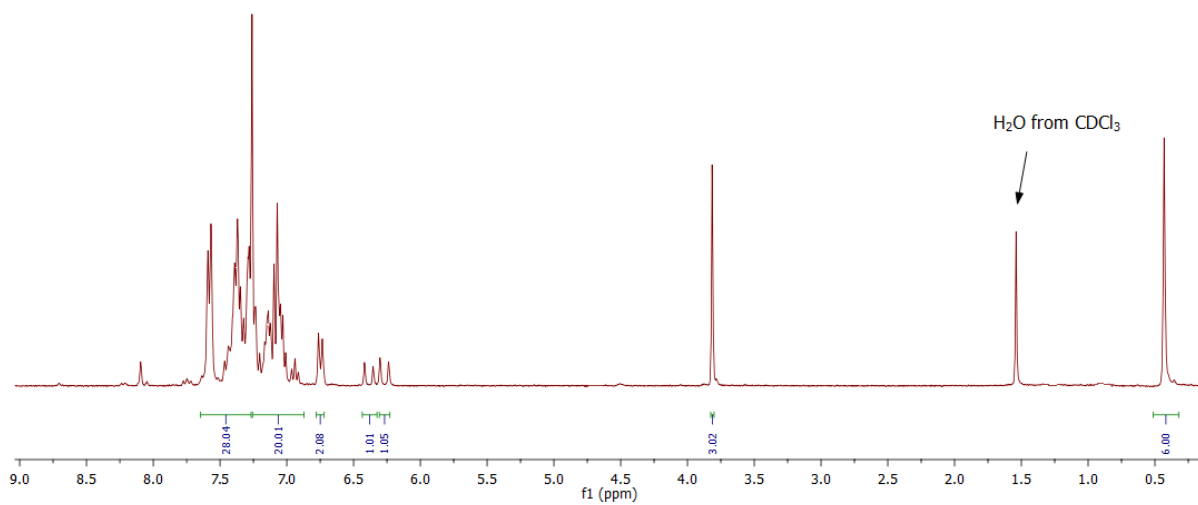

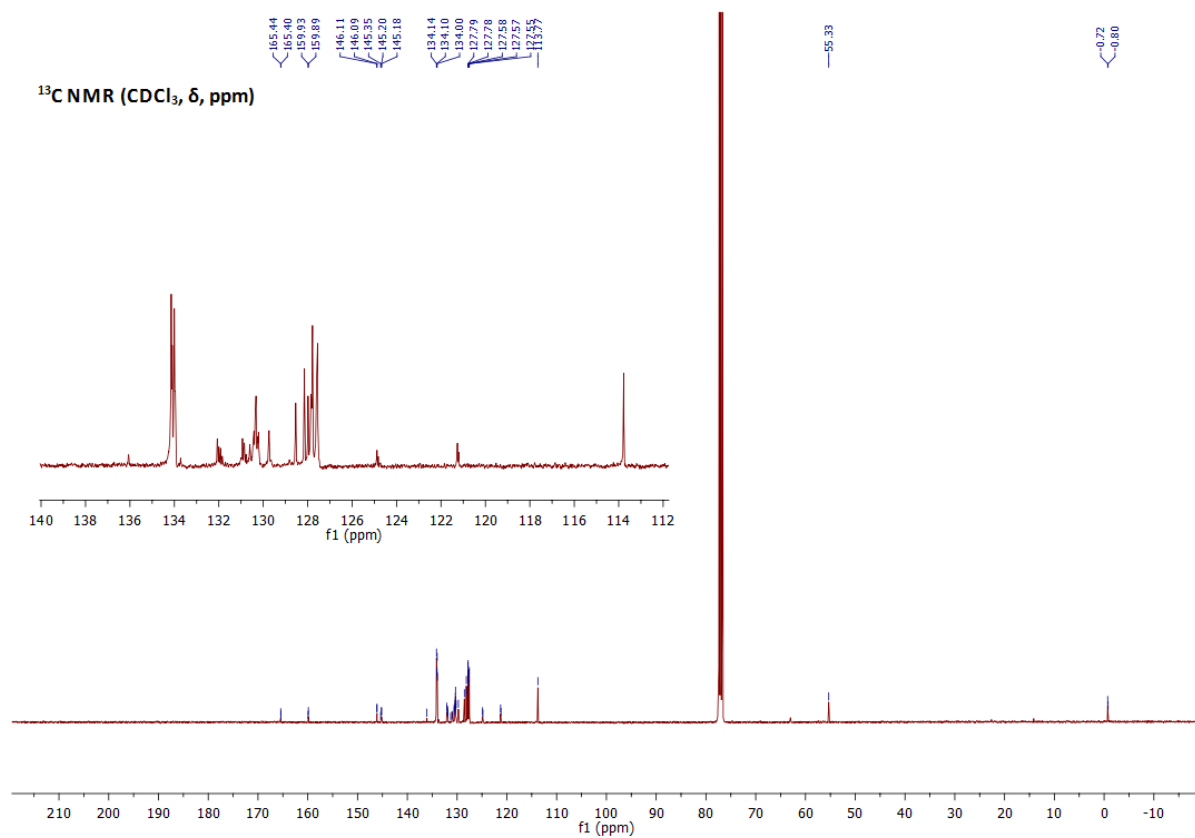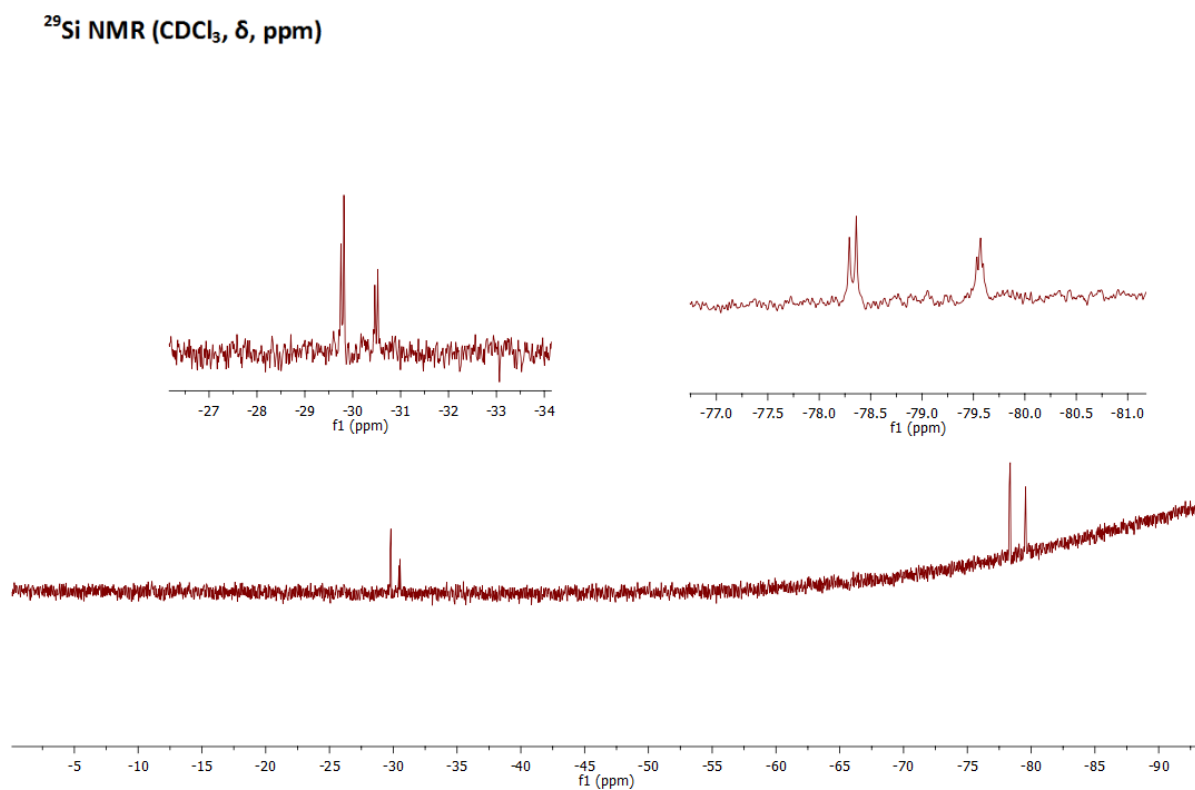

$^1\text{H}$  NMR ( $\text{CDCl}_3$ ,  $\delta$ , ppm)

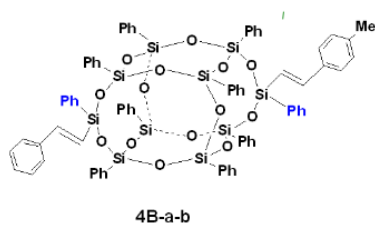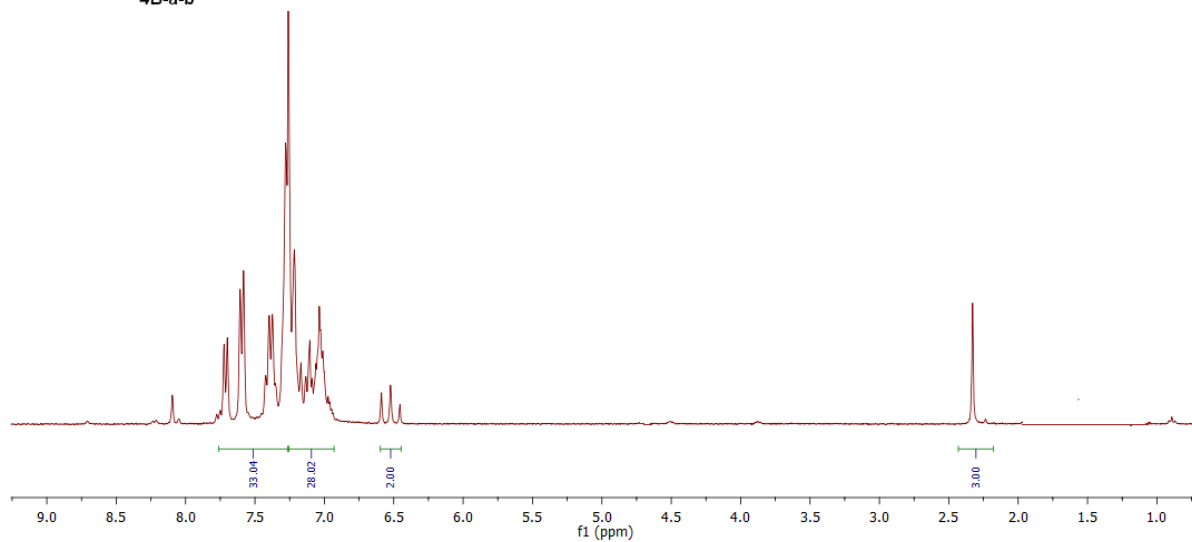

$^{13}\text{C}$  NMR ( $\text{CDCl}_3$ ,  $\delta$ , ppm)

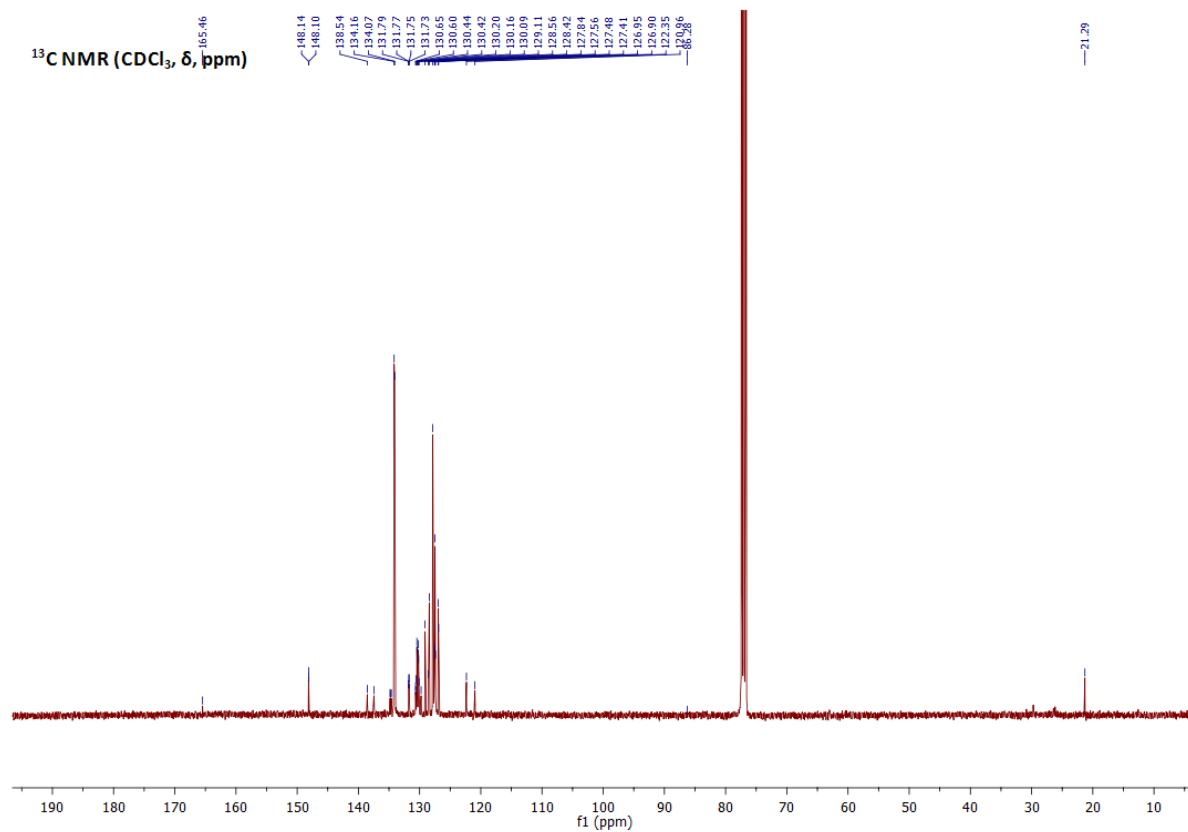



$^{29}\text{Si}$  NMR ( $\text{CDCl}_3$ ,  $\delta$ , ppm)

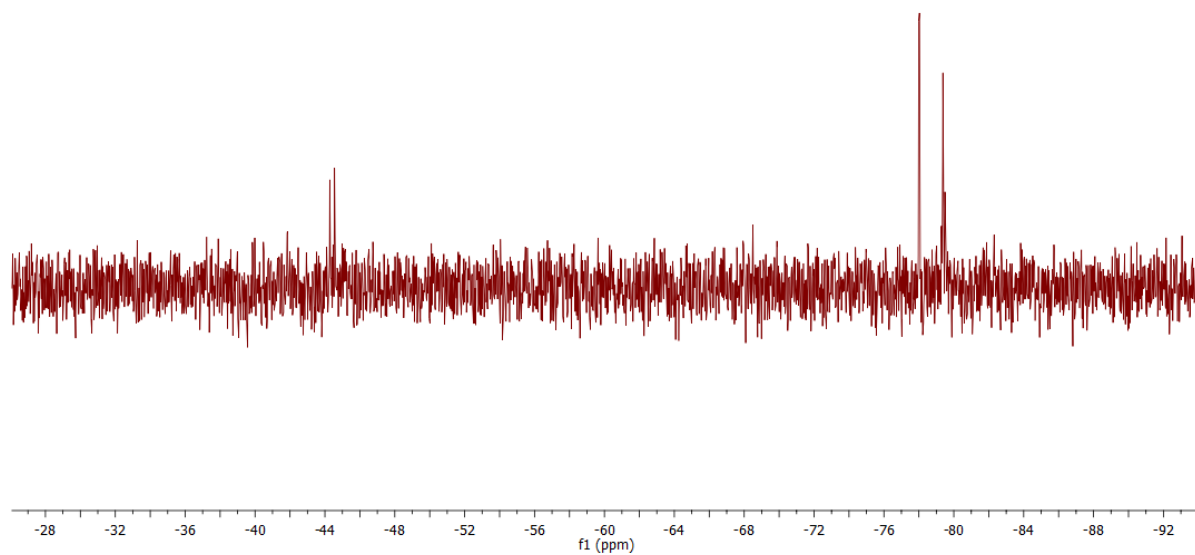

$^1\text{H}$  NMR ( $\text{CDCl}_3$ ,  $\delta$ , ppm)

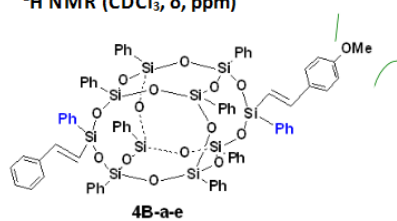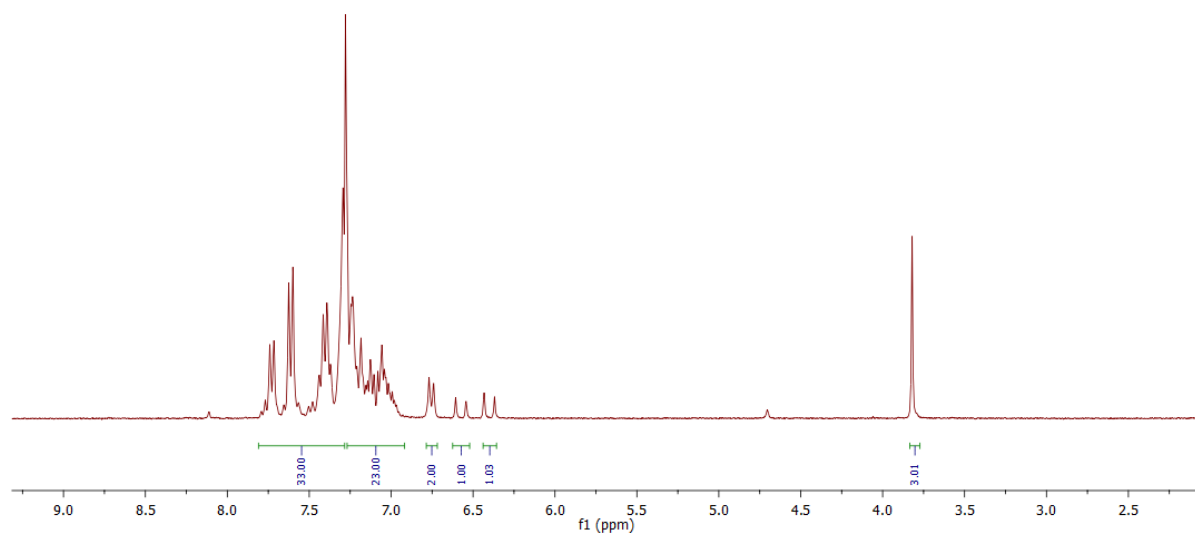

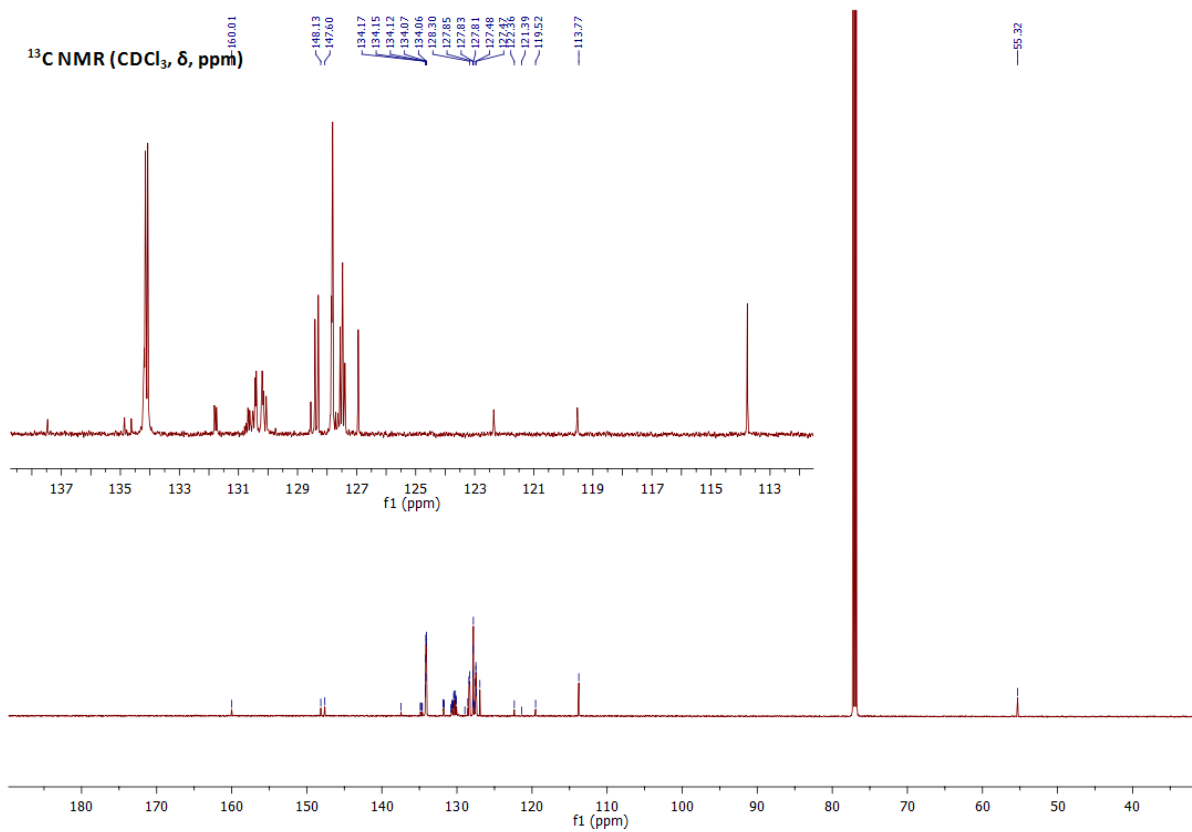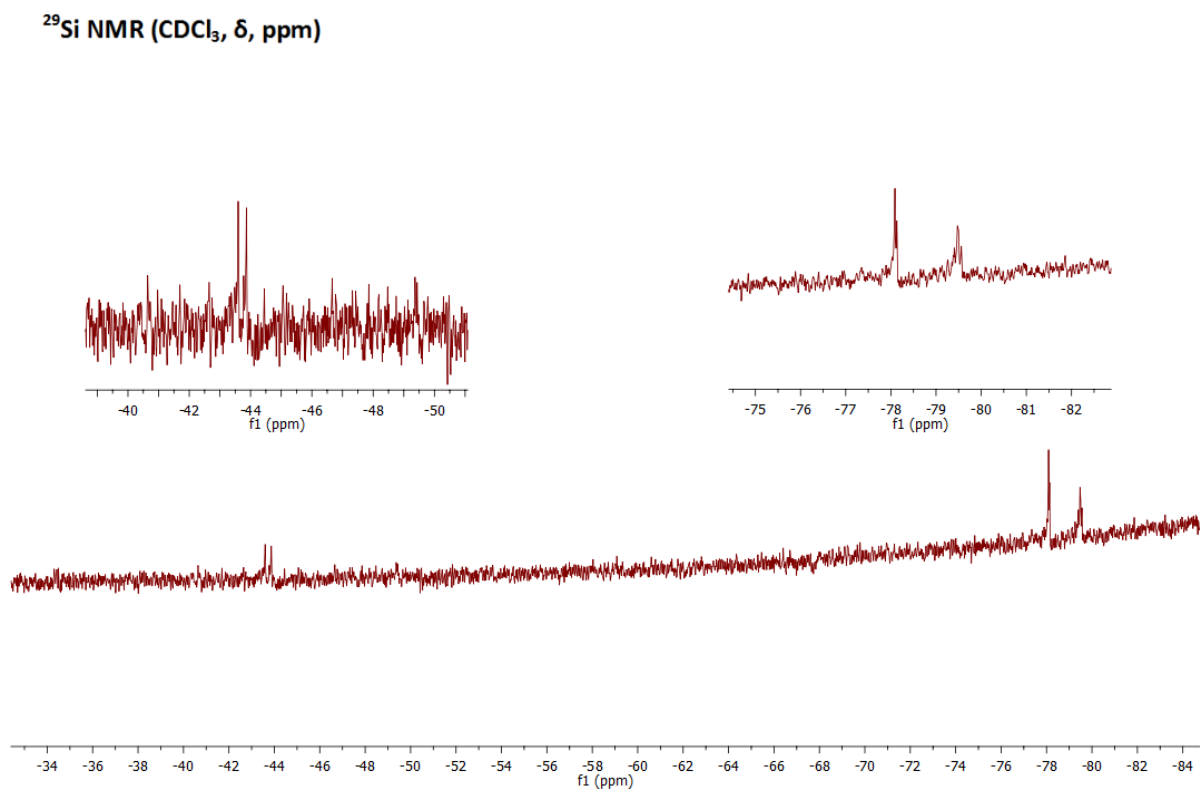

$^1\text{H}$  NMR ( $\text{CDCl}_3$ ,  $\delta$ , ppm)

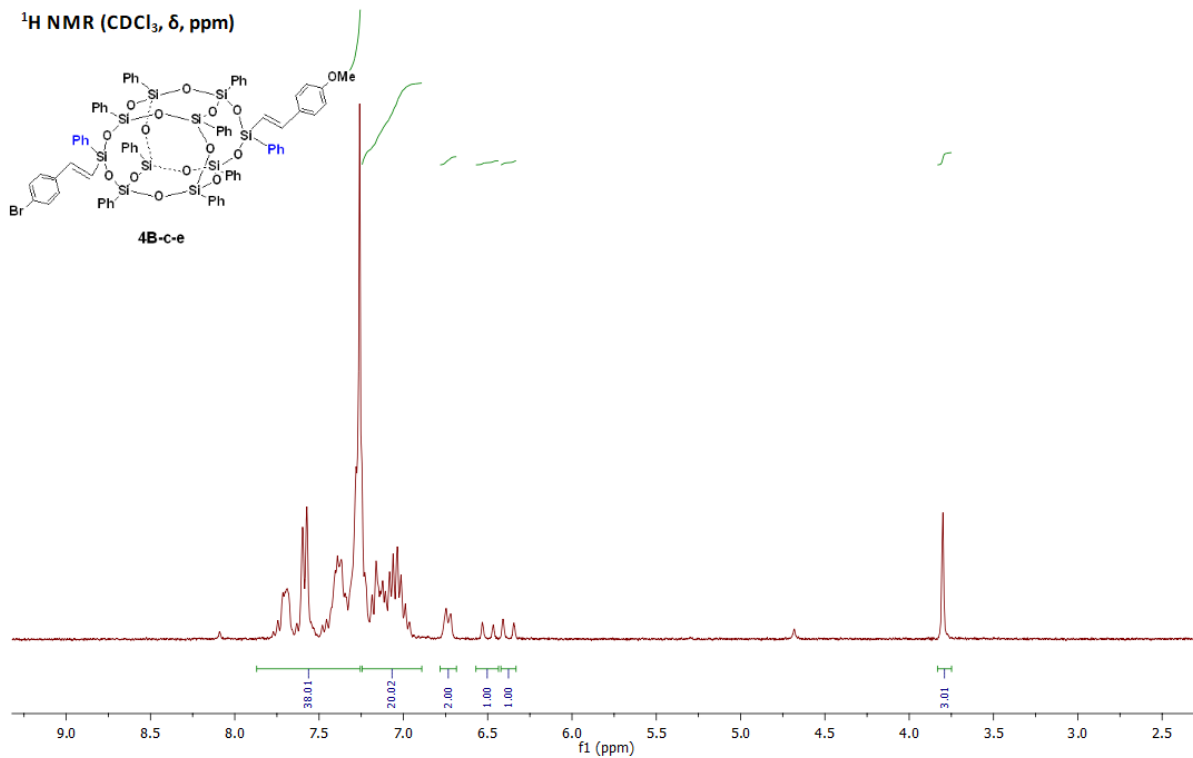

$^{13}\text{C}$  NMR ( $\text{CDCl}_3$ ,  $\delta$ , ppm)

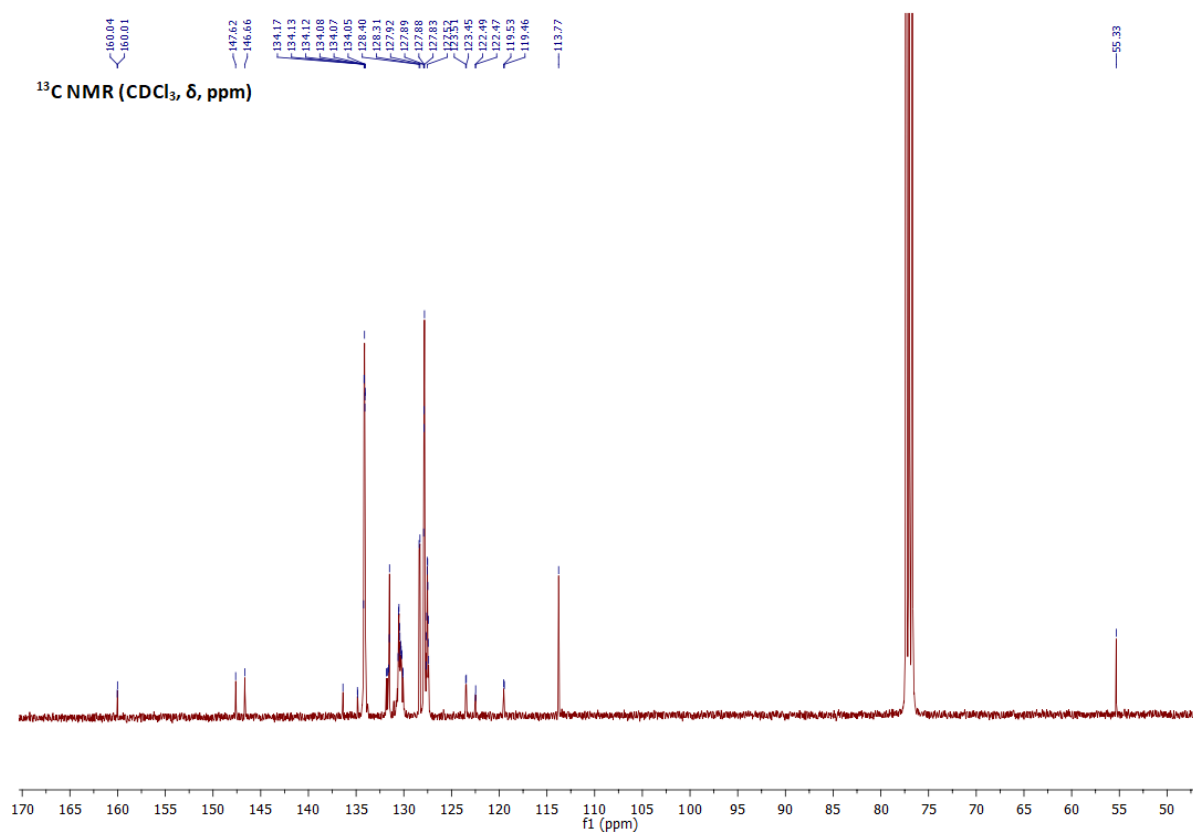

$^{29}\text{Si}$  NMR ( $\text{CDCl}_3$ ,  $\delta$ , ppm)

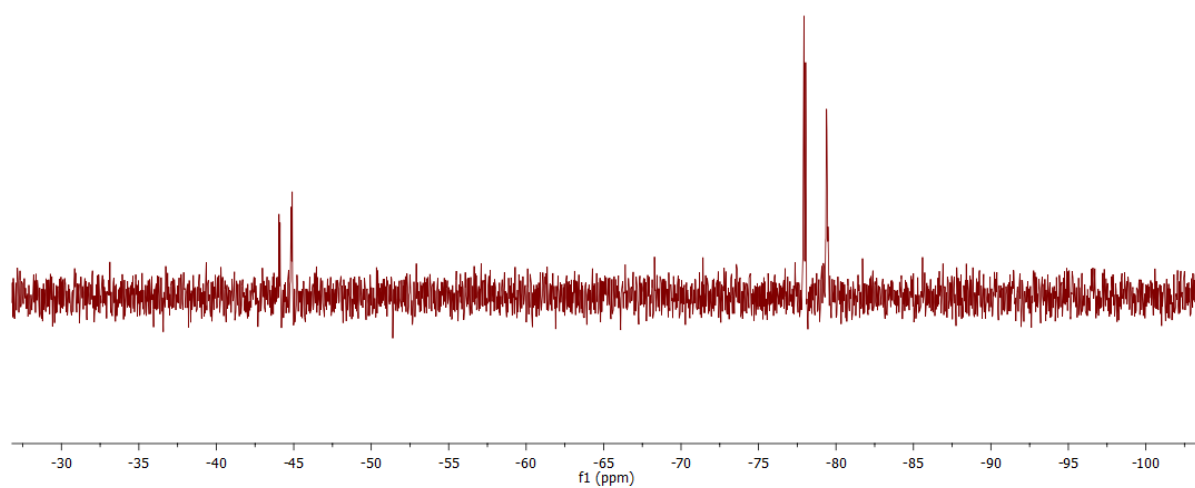

$^1\text{H}$  NMR ( $\text{CDCl}_3$ ,  $\delta$ , ppm)

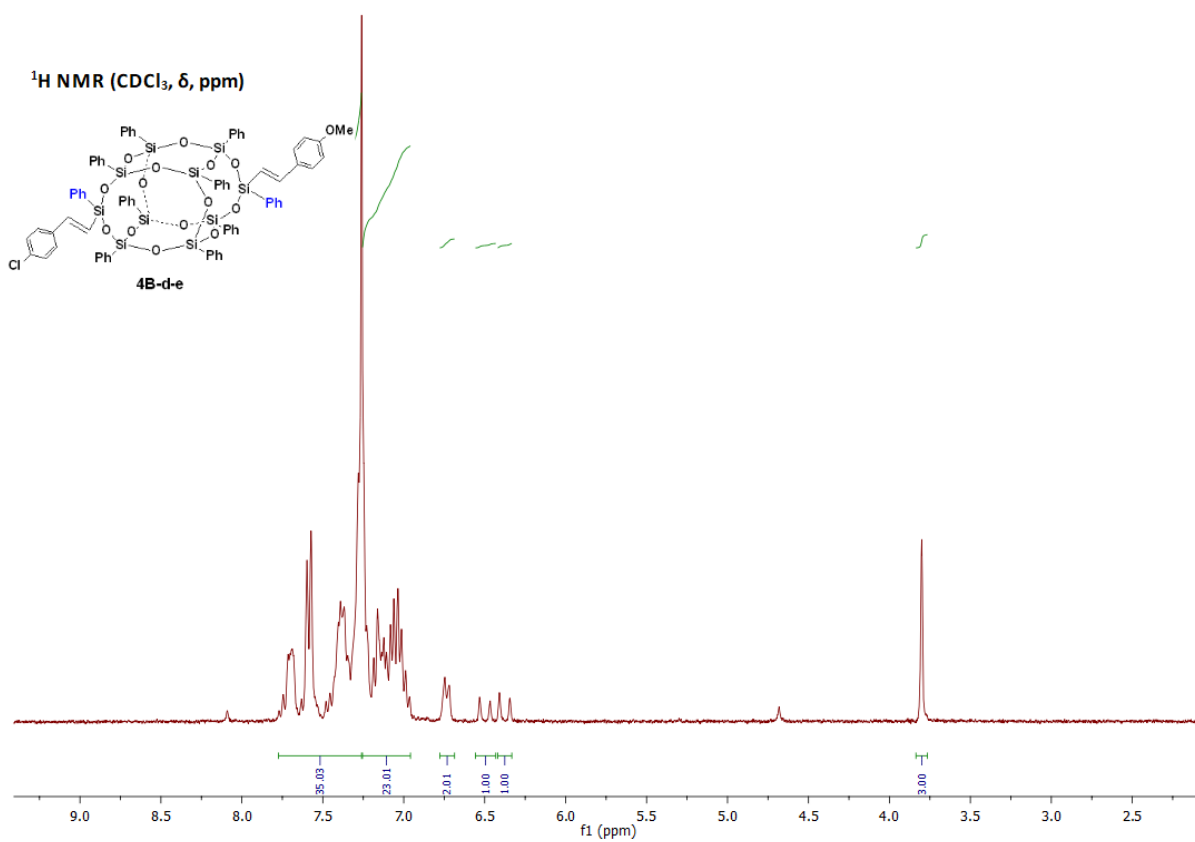

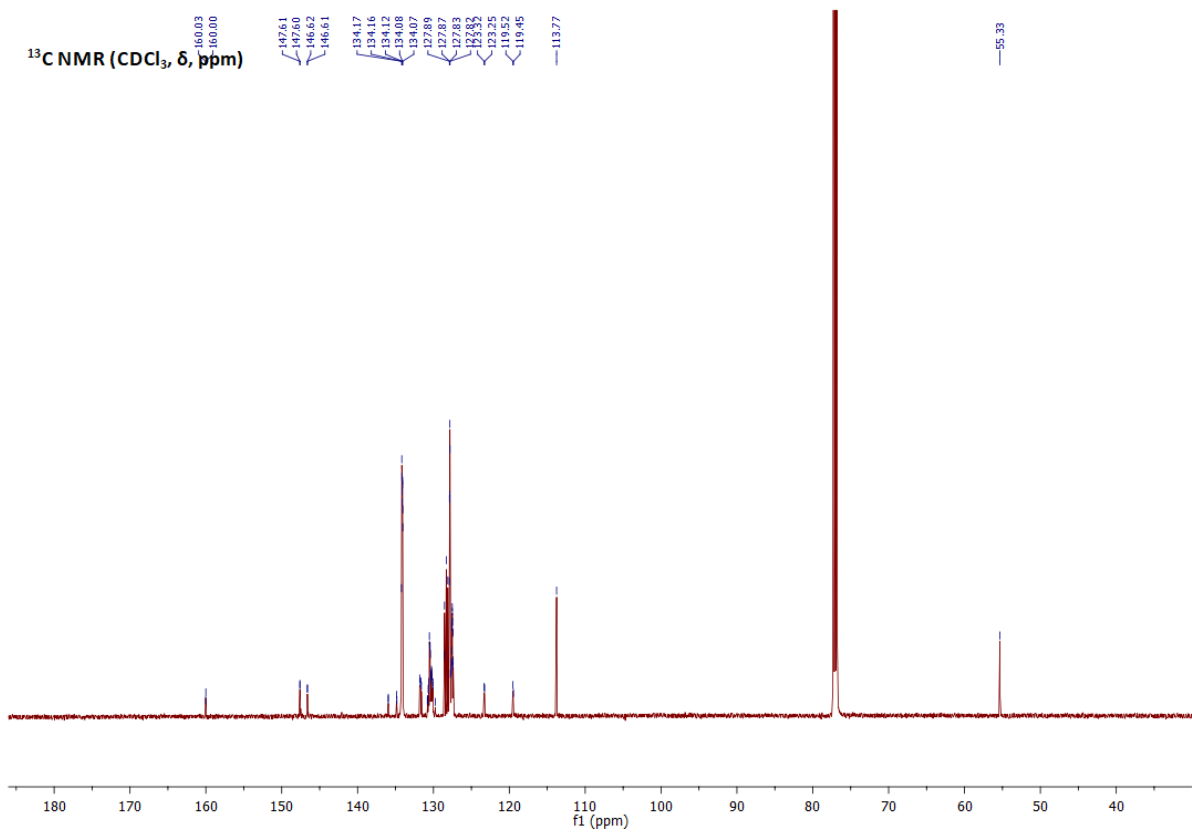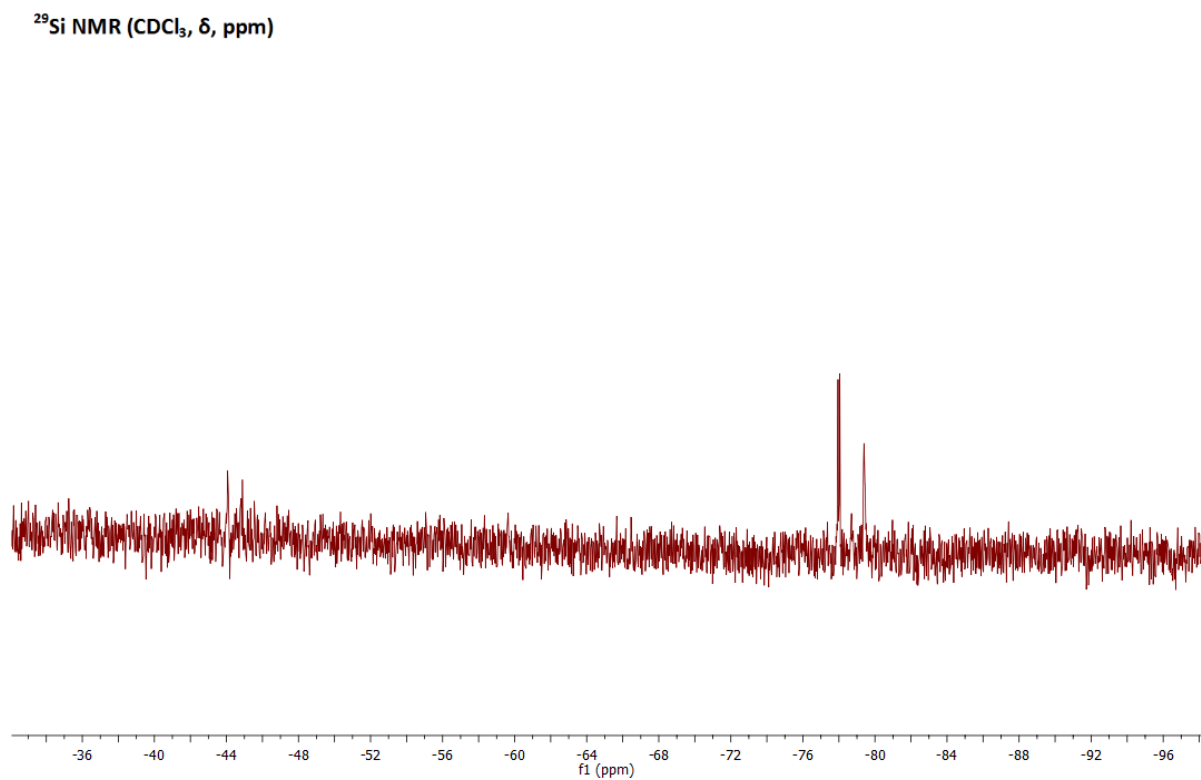

$^1\text{H}$  NMR ( $\text{CDCl}_3$ ,  $\delta$ , ppm)

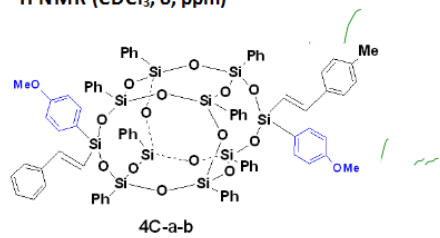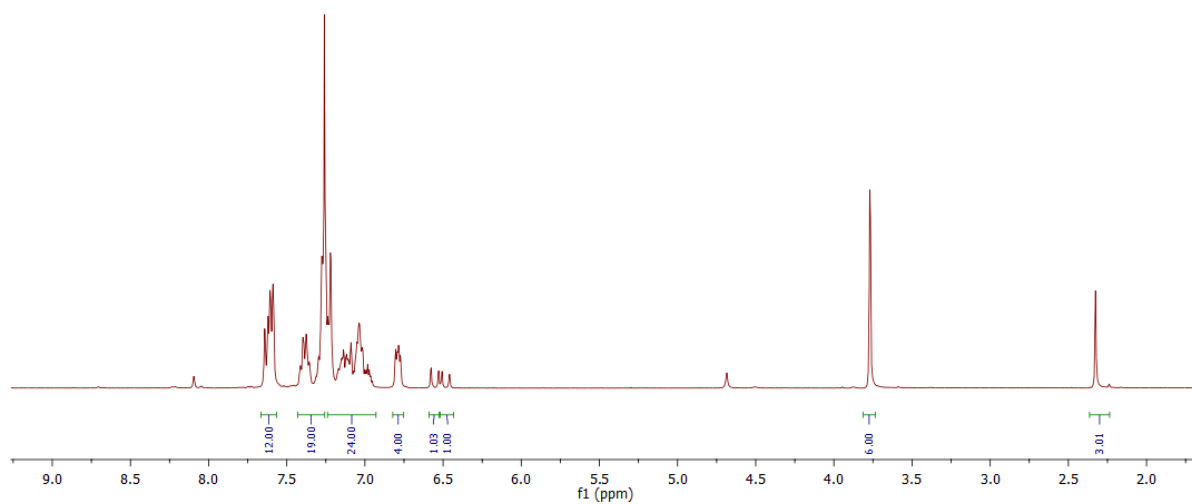

$^{13}\text{C}$  NMR ( $\text{CDCl}_3$ ,  $\delta$ , ppm)

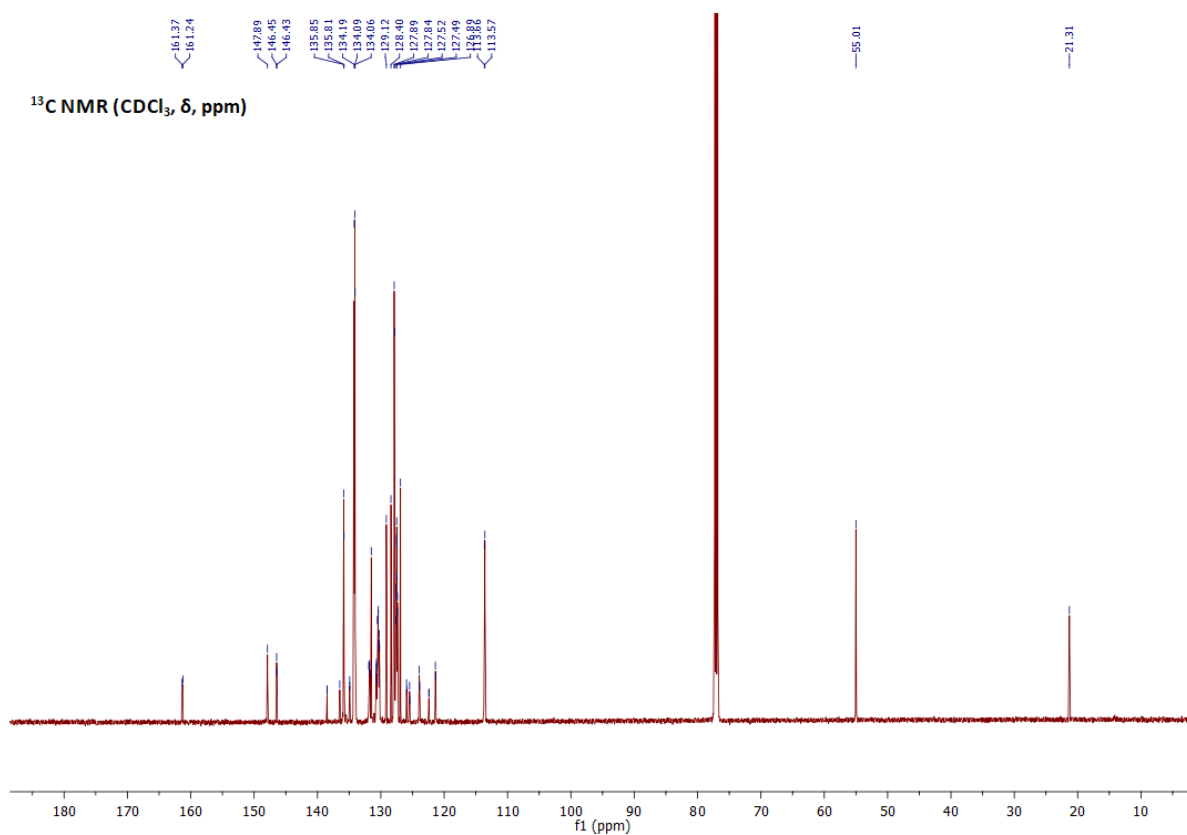

$^{29}\text{Si}$  NMR ( $\text{CDCl}_3$ ,  $\delta$ , ppm)

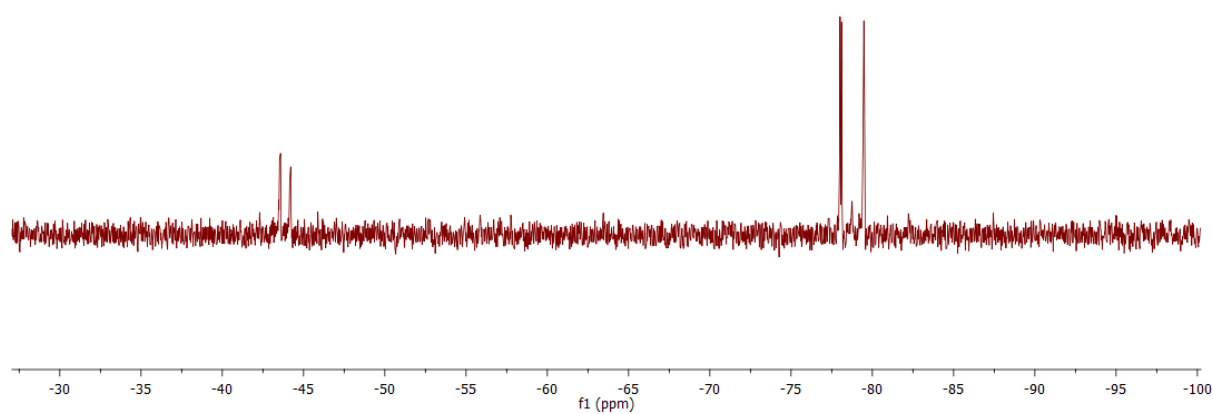

$^1\text{H}$  NMR ( $\text{CDCl}_3$ ,  $\delta$ , ppm)

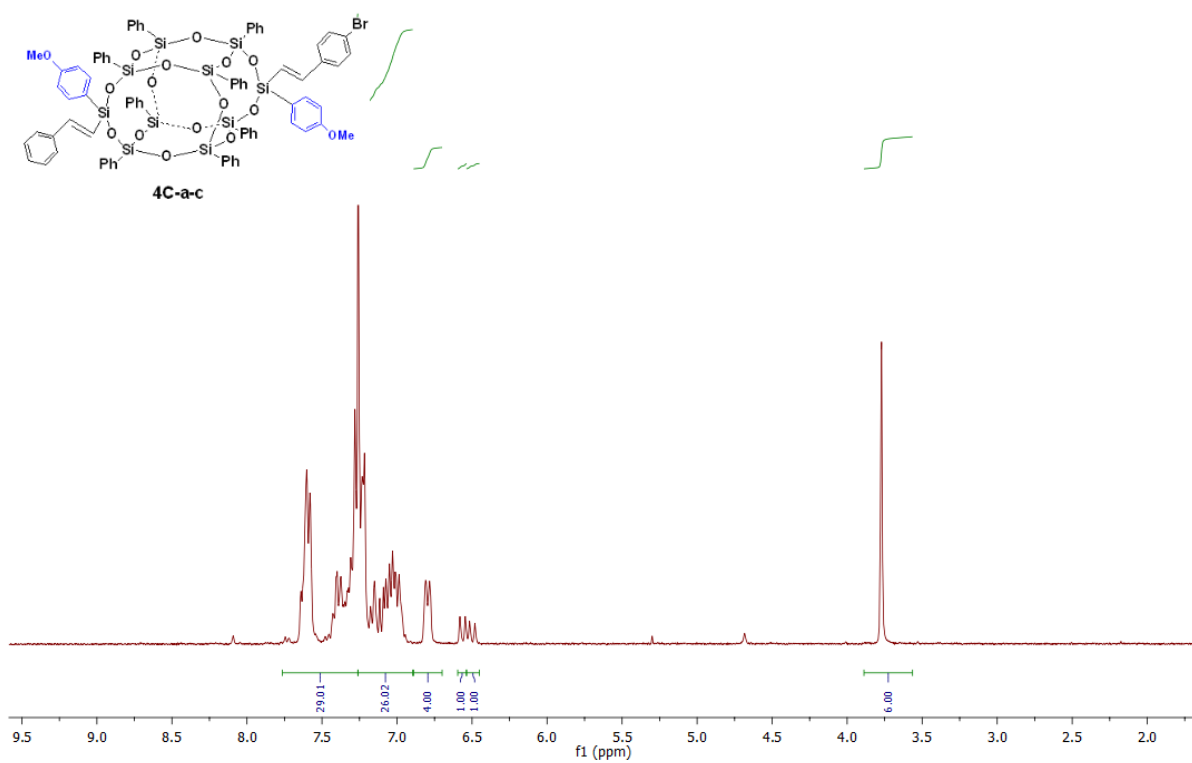

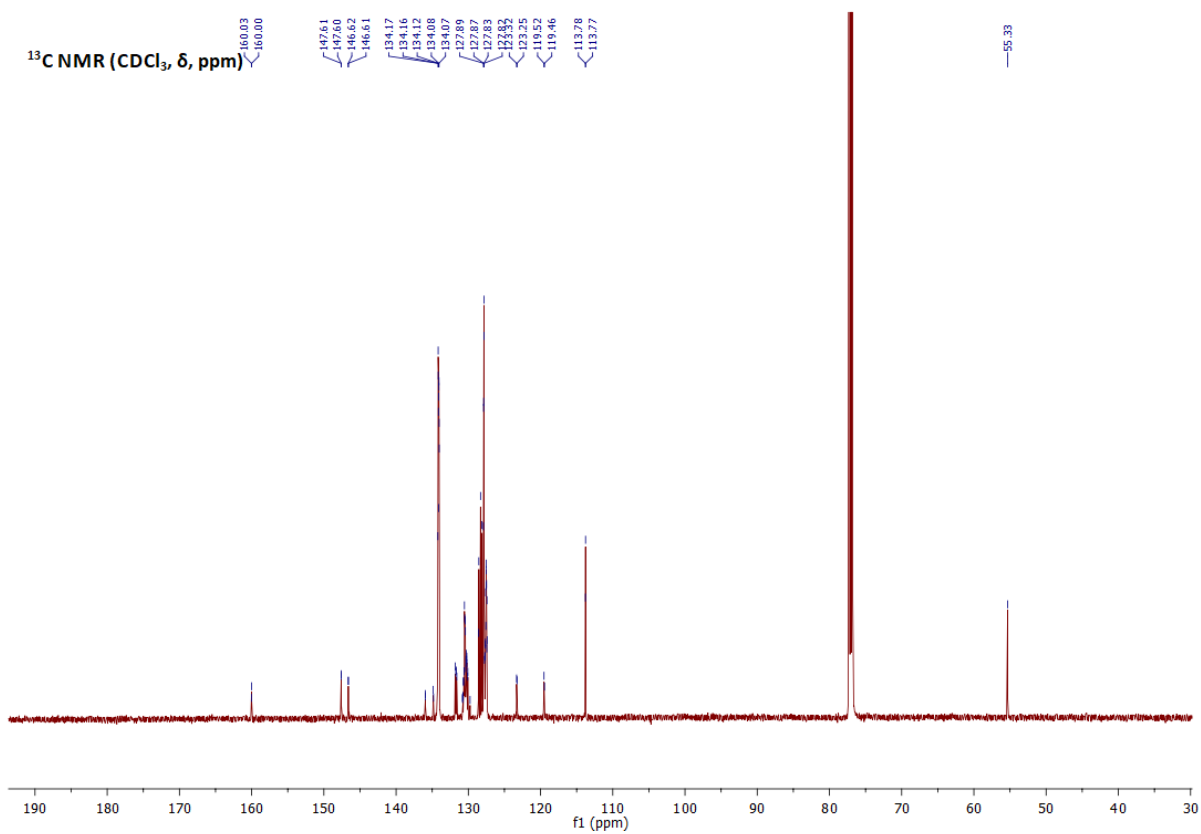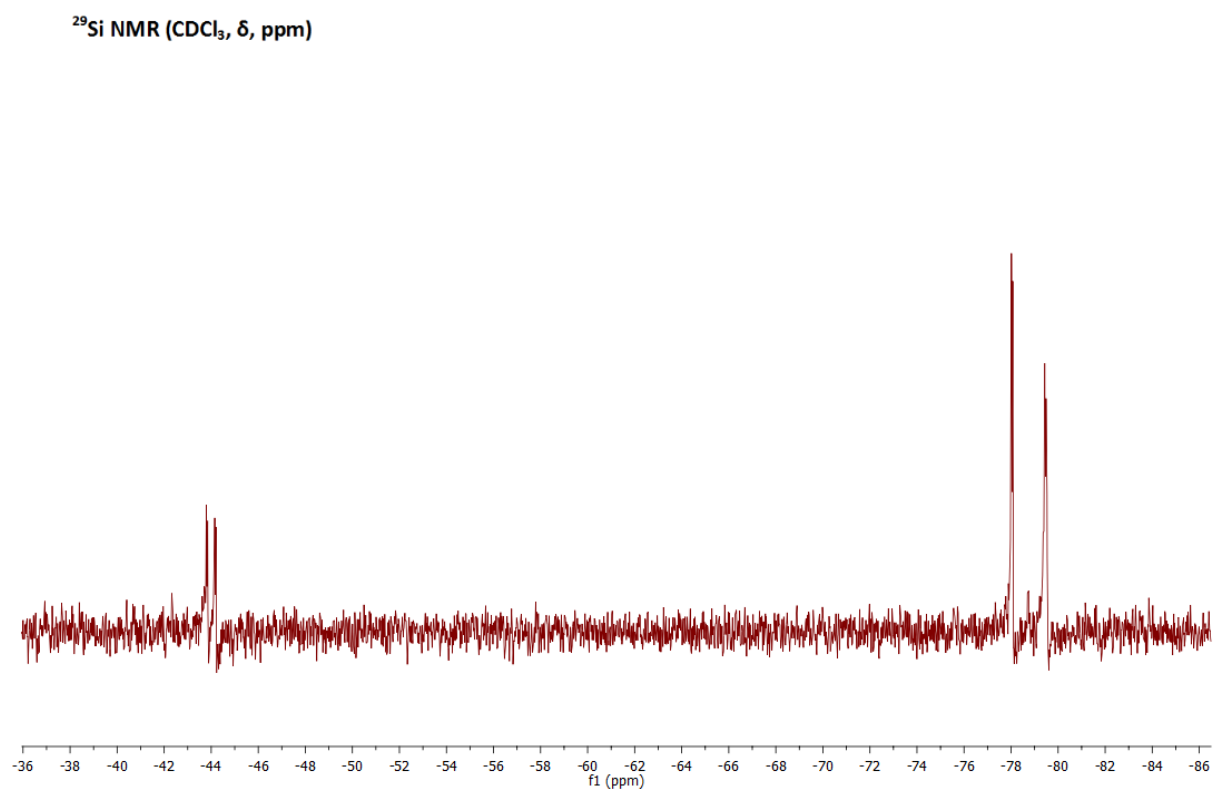



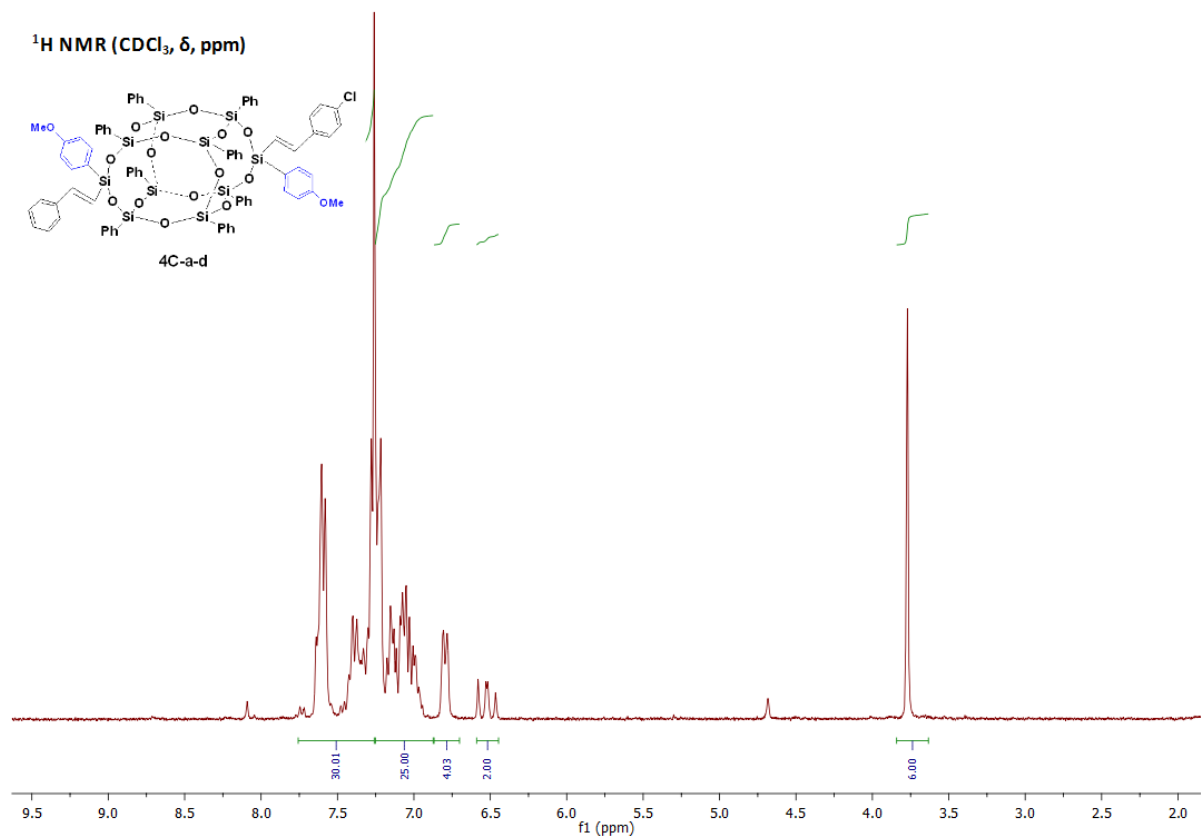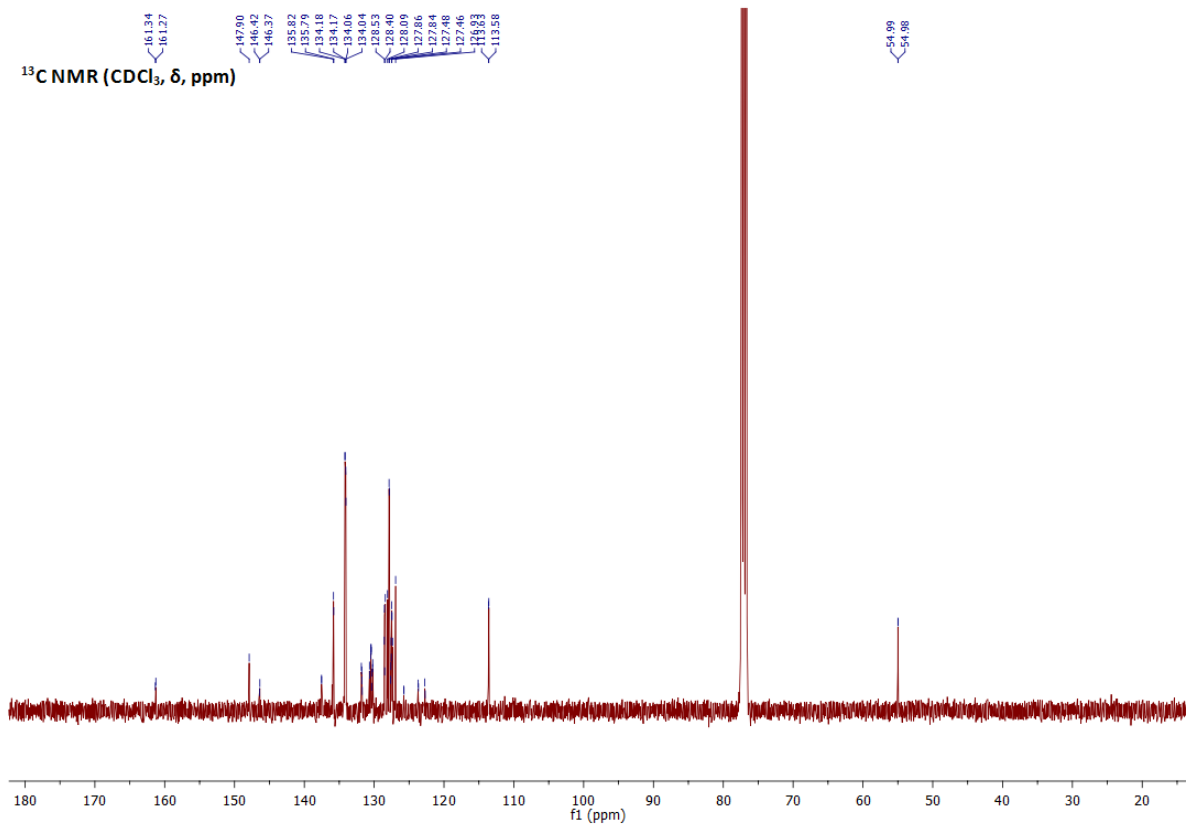

$^{29}\text{Si}$  NMR ( $\text{CDCl}_3$ ,  $\delta$ , ppm)



$^1\text{H}$  NMR ( $\text{CDCl}_3$ ,  $\delta$ , ppm)

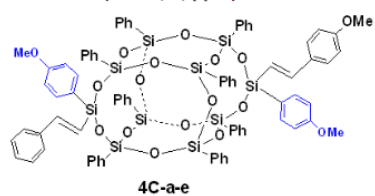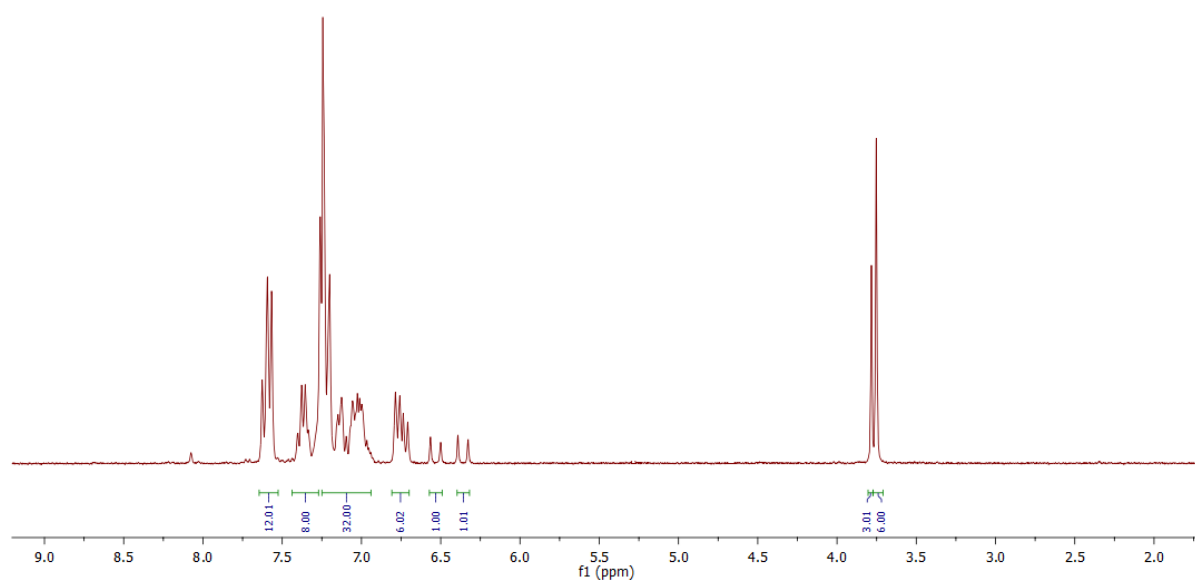

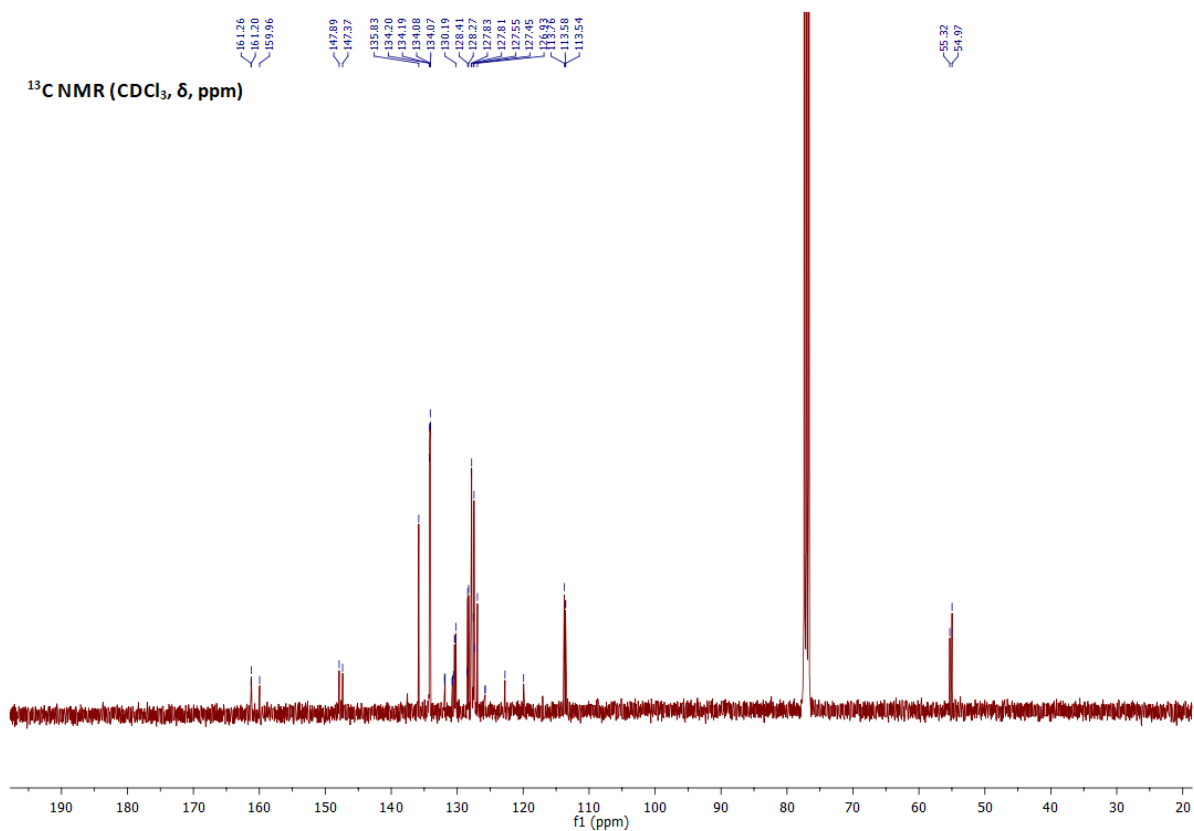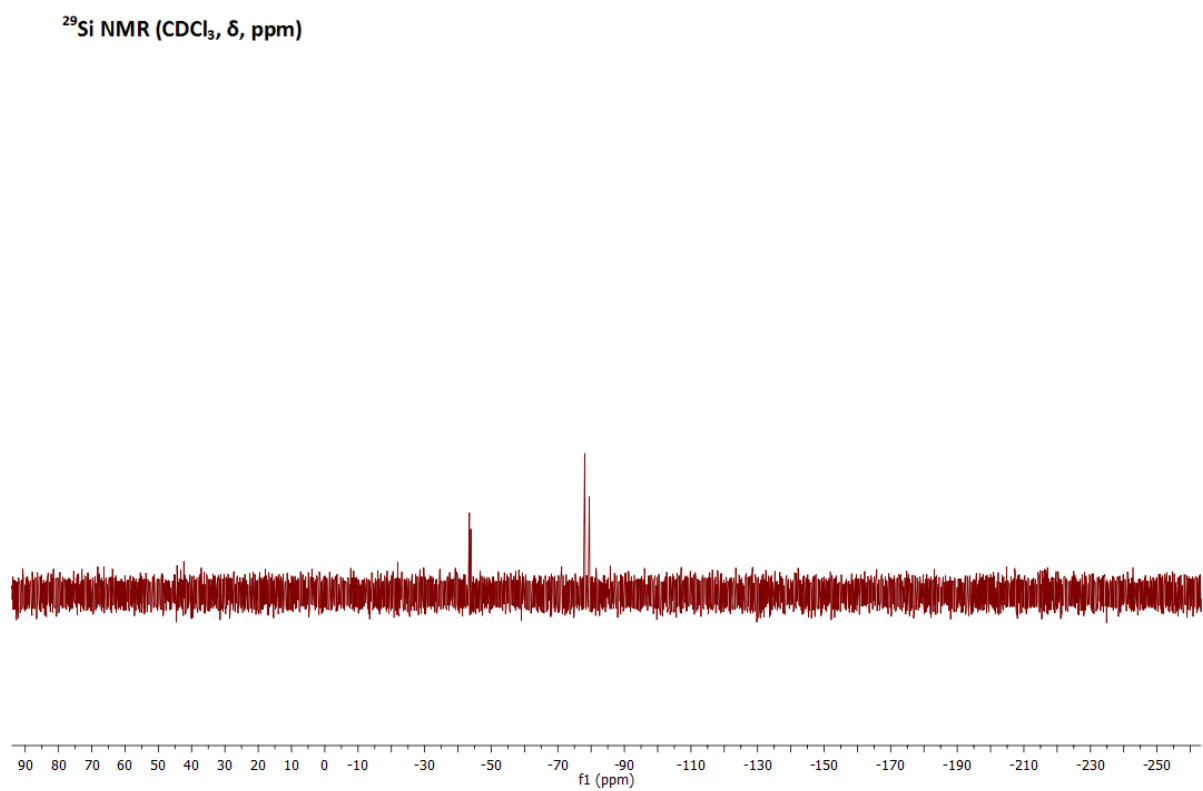

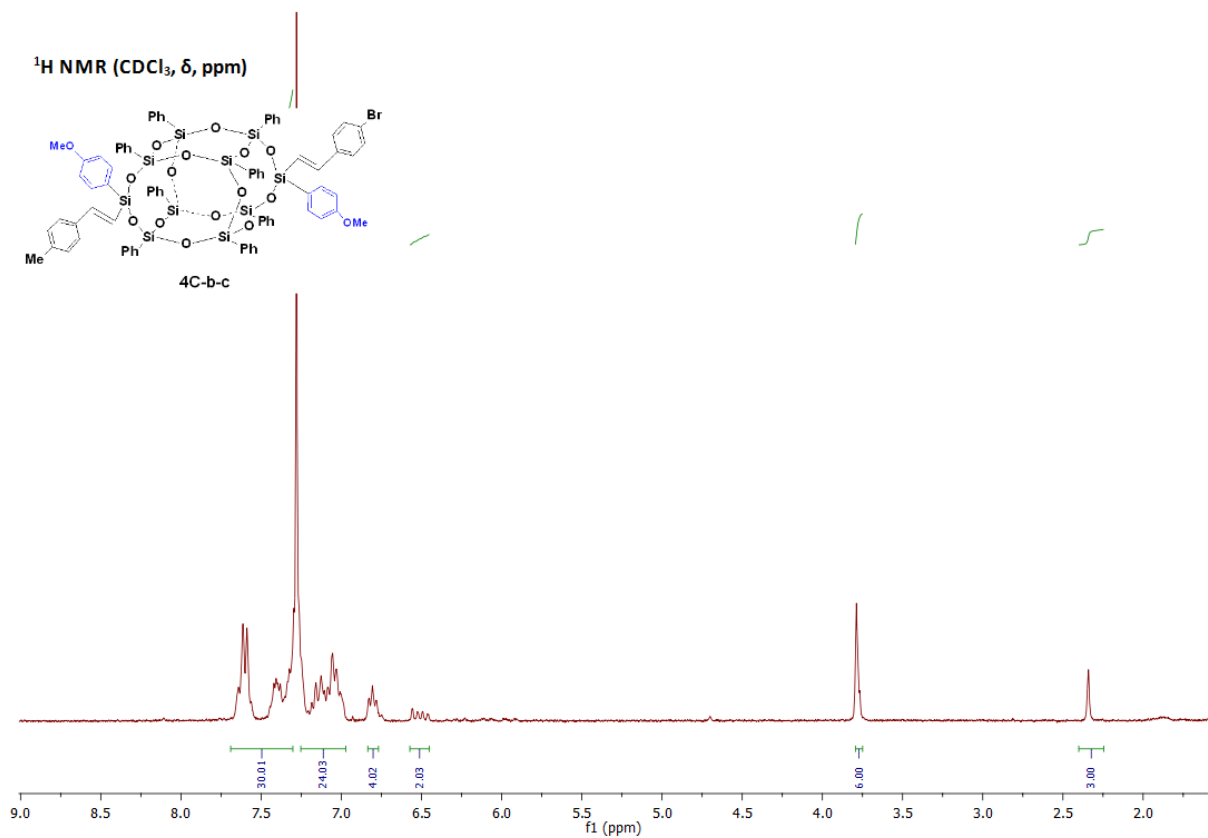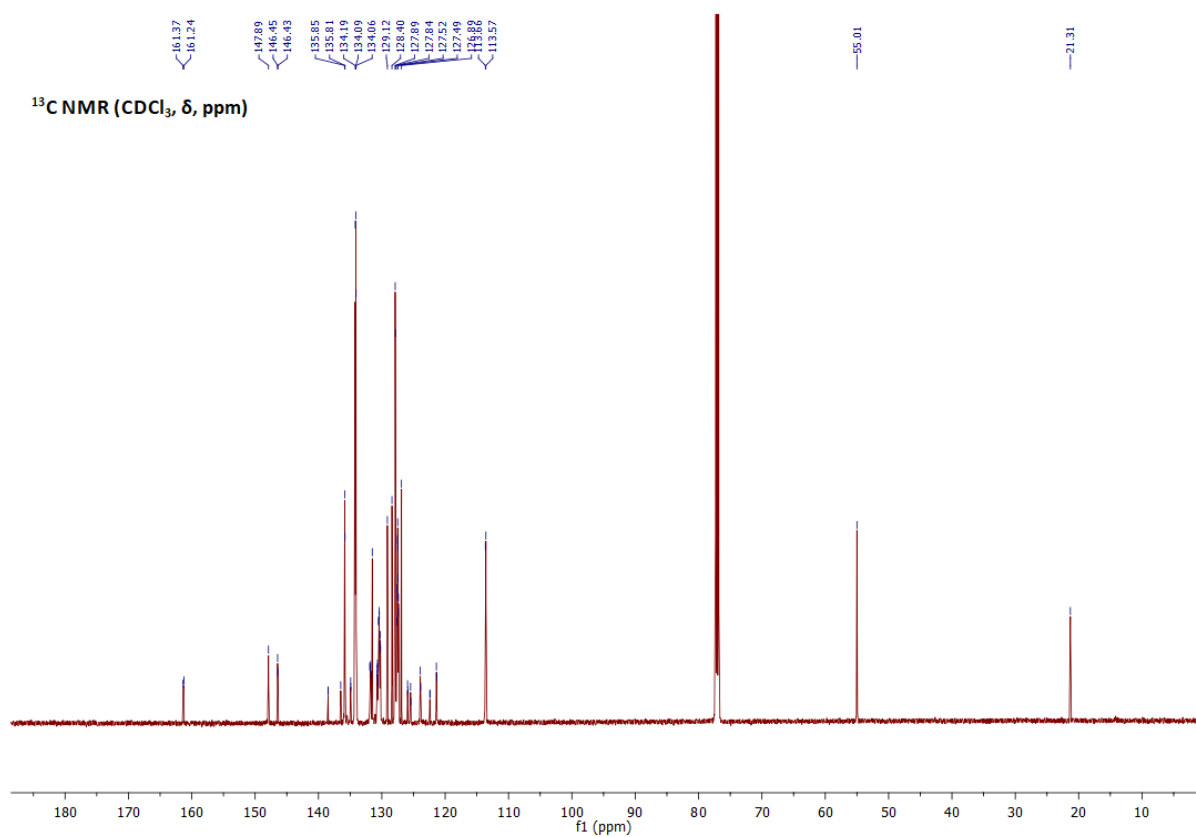

$^{29}\text{Si}$  NMR ( $\text{CDCl}_3$ ,  $\delta$ , ppm)

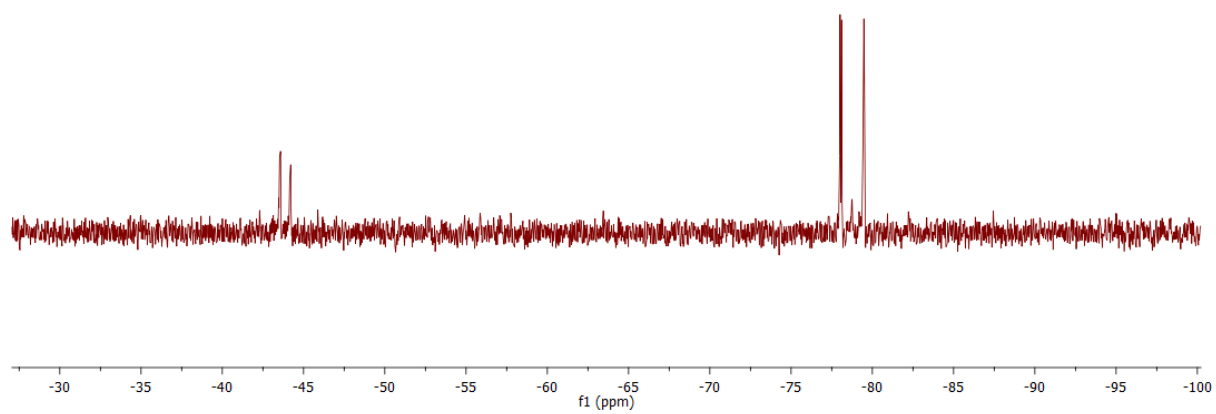

Supplement: c8cc01316k1.pdf [file c8cc01316k1.pdf]
